# Supplementary material for: Brønsted acidic ionic liquid-promoted direct C3-acylation of N-unsubstituted indoles with acid anhydrides under microwave irradiation
Source: Royal Society of Chemistry journal article supplement (doi:10.1039/c7ra11362e), 2017-01-01

## Supporting information

# Brønsted acidic ionic liquid-promoted direct C3-acylation of *N*-unsubstituted indoles with acid anhydrides under microwave irradiation

Phuong Hoang Tran, Anh-Thanh Duy Nguyen, Hai Truong Nguyen, Thach Ngoc Le

## Table of content

|                                                                                                           |                |
|-----------------------------------------------------------------------------------------------------------|----------------|
| <b>Section S1.</b> Chemicals and instruments                                                              | <b>S1</b>      |
| <b>Section S2.</b> Synthesis of [(4-SO <sub>3</sub> H)BMIM]HSO <sub>4</sub> under solvent-free sonication | <b>S1-S2</b>   |
| <b>Section S3.</b> Effect of different catalysts and heating method in propionylation of indole.          | <b>S3</b>      |
| <b>Section S4.</b> Spectral data                                                                          | <b>S3-S14</b>  |
| <b>Section S5.</b> References                                                                             | <b>S14-S15</b> |
| <b>Section S6.</b> <sup>1</sup> H, <sup>13</sup> C NMR and HR-MS spectra                                  | <b>S16-S49</b> |

## Section S1. Chemicals and instruments

Indole (assay  $\geq$  99%), 5-methylindole (assay  $\geq$  99%), 5-methoxyindole (assay  $\geq$  99%), 5-fluoroindole (assay  $\geq$  98%), 5-chloroindole (assay  $\geq$  98%), 5-bromoindole (assay  $\geq$  99%), 4-bromoindole (assay  $\geq$  96%), acetic anhydride (ACS reagent, assay  $\geq$  98.0%), propionic anhydride (assay  $\geq$  99%), butyric anhydride (assay  $\geq$  98%), isobutyric anhydride (assay  $\geq$  97%), *tert*-butyric anhydride (assay  $\geq$  97%), benzoic anhydride (assay  $\geq$  95%), *N*-methylimidazole (ReagentPlus®, assay  $\geq$  99%) and 1,4-butane sultone (assay  $\geq$  97%) were purchased from Sigma-Aldrich and immediately used without further purification. Silica gel 230–400 mesh (for column chromatography) was obtained from Merck. Ethyl acetate (purity  $\geq$  99.5%), *n*-hexane, and chloroform (purity  $\geq$  99%) were obtained from Xilong Chemical Co., Ltd (China). Chloroform-*d*, 99.8 Atom %D was obtained from Armar (Switzerland). All starting materials were used without further purification. Microwave irradiation was performed on a CEM Discover for organic synthesis with safe pressure regulation using a 10 mL pressurized glass tube with a Teflon-coated septum and vertically-focused IR temperature sensor controlling the reaction temperature. Ultrasound irradiation was performed on Elmasonic S 30 (H) Ultrasonic cleaning unit (37 kHz). GC–MS spectra were performed on an Agilent GC System 7890 equipped with a mass selective detector Agilent 5973N and a capillary DB–5MS column (30 m x 250  $\mu$ m x 0.25  $\mu$ m). FT-IR spectra were analyzed from KBr pellets by a Bruker Vertex 70.  $^1\text{H}$  and  $^{13}\text{C}$  NMR spectra were recorded on a Bruker Advance 500. HRMS (ESI) data were performed on Bruker micrOTOF-QII MS at 80 eV.

## Section S2. Synthesis of [(4-SO<sub>3</sub>H)BMIM]HSO<sub>4</sub> under solvent-free sonication

The synthesis of the [(4-SO<sub>3</sub>H)BMIM]HSO<sub>4</sub> was similar to those used in the previous literature, and the comprehensive synthesis was as follows:

**The first step:** 1-Methylimidazole (1.5 mmol, 0.123 g) and 1,4-butane sultone (1.5 mmol, 0.204 g) were added into a 10 mL pressurized glass tube with Teflon-coated septum. The reaction mixture was irradiated by ultrasound for 5 min at 80 °C (37 kHz). After completion of the reaction, the zwitterion [4-(SO<sub>3</sub><sup>-</sup>

)BMIM]<sup>+</sup> was washed with diethyl ether (6 x 5 mL), and dried under vacuum at 80 °C for 30 min to give the pure product.

**The second step:** A mixture of [4-(SO<sub>3</sub><sup>-</sup>)BMIM]<sup>+</sup> (1.5 mmol, 0.327 g) and sulfuric acid 98% (1.5 mmol, 0.147 g) was added into a 10 mL pressurized glass tube with Teflon-coated septum, which was irradiated by ultrasound for 60 min at 60 °C (37 kHz). The mixture reaction was washed with diethyl ether (10 x 3 mL). Then, the mixture [(4-SO<sub>3</sub>H)BMIM]HSO<sub>4</sub> was dried under vacuum at 40 °C. The product was then characterized by <sup>1</sup>H and <sup>13</sup>C NMR, and HR-MS (ESI).

**Table S1.** Optimization of reaction condition for the first step.

| Entry | Time (min) | Temperature (°C) | Isolated yield (%) |
|-------|------------|------------------|--------------------|
| 1     | 5          | 50               | 65                 |
| 2     | 5          | 60               | 76                 |
| 3     | 5          | 70               | 88                 |
| 4     | 5          | 80               | 99                 |
| 5     | 1          | 80               | 42                 |
| 6     | 3          | 80               | 57                 |

**Table S2.** Optimization of reaction conditions for the second step.

| Entry | Time (min) | Temperature (°C) | Isolated yield (%) |
|-------|------------|------------------|--------------------|
| 1     | 30         | RT (30)          | 0                  |
| 2     | 30         | 40               | 21                 |
| 3     | 30         | 50               | 34                 |
| 4     | 30         | 60               | 53                 |
| 5     | 30         | 70               | 40                 |
| 6     | 40         | 60               | 75                 |
| 7     | 60         | 60               | 95                 |
| 8     | 90         | 60               | 97                 |

**Section S3.** Effect of different catalyst and heating method in propionylation of indole.

**Table S3.** Effect of different catalysts and heating method for the Friedel–Crafts C3-propionylation of indole.<sup>a</sup>

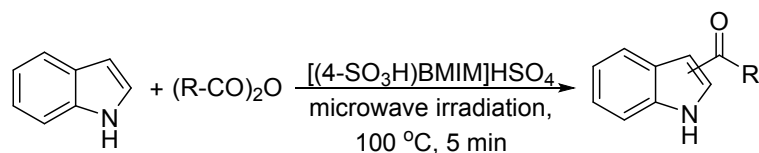

| Entry | Catalyst                                    | Heating method                      | Yield (%) | Selectivity (1:2:3) |
|-------|---------------------------------------------|-------------------------------------|-----------|---------------------|
| 1     | [BMIM]PF <sub>6</sub>                       | Microwave irradiation               | 0         | -                   |
| 2     | [BMIM]OTf                                   | Microwave irradiation               | 14        | 1:0:99              |
| 3     | [EMIM]Cl                                    | Microwave irradiation               | 0         | -                   |
| 4     | [BMIM]H <sub>2</sub> PO <sub>4</sub>        | Microwave irradiation               | 27        | 2:0:98              |
| 4     | H <sub>2</sub> SO <sub>4</sub>              | Microwave irradiation               | 0         | -                   |
| 5     | H <sub>2</sub> SO <sub>4</sub>              | Microwave irradiation               | 0         | -                   |
| 6     | [(4-SO <sub>3</sub> H)BMIM]HSO <sub>4</sub> | Microwave irradiation               | 92        | 1:0:99              |
| 7     | [(4-SO <sub>3</sub> H)BMIM]HSO <sub>4</sub> | Magnetic stirring <sup>d</sup>      | 10        | 50:0:50             |
| 8     | [(4-SO <sub>3</sub> H)BMIM]HSO <sub>4</sub> | Ultrasound irradiation <sup>e</sup> | 0         | -                   |

<sup>a</sup> Reaction condition: Indole (1.0 mmol), propionic anhydrides (1.0 mmol), and catalyst (25 mol%) at 100 °C for 8 min.

<sup>b</sup> Isolated yield. <sup>c</sup> Determined by GC-MS.

<sup>d</sup> For 60 min. <sup>e</sup> At 80 °C for 60 min

## Section S4. Spectral data

### 1-(4-sulfobutyl)-3-methylimidazolium hydrogen sulfate (BAIL)

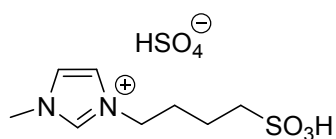

**FT-IR** (KBr, 4000 – 400 cm<sup>-1</sup>) 3410, 1639, 1457, 1171, 1042, 752.

**<sup>1</sup>H NMR** (500 MHz, D<sub>2</sub>O) δ 8.59 (s, 1H), 7.35 (t, *J* = 1.7 Hz, 1H), 7.29 (t, *J* = 1.7 Hz, 1H), 4.10 (t, *J* = 7.0 Hz, 2H), 3.75 (s, 3H), 2.83 (t, *J* = 8.0, 2H), 1.82 (m, 2H), 1.60 (m, 2H).

**<sup>13</sup>C NMR** (125 MHz, D<sub>2</sub>O) δ 135.9, 123.6, 122.1, 50.0, 48.9, 35.7, 28.1, 20.9.

**HRMS** (ESI) *m/z* calcd for [M<sup>+</sup>] C<sub>8</sub>H<sub>15</sub>N<sub>2</sub>O<sub>3</sub>S<sup>+</sup> 219.0798; found 219.0783.

### 3-Acetylidole<sup>1</sup>

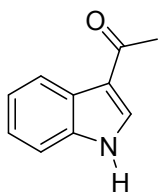

**<sup>1</sup>H NMR** (500 MHz, CDCl<sub>3</sub>)  $\delta$  8.76 (br s, 1H), 8.40–8.39 (m, 1H), 7.87 (s, 1H), 7.43–7.41 (m, 1H), 7.30–7.29 (m, 2H), 2.56 (s, 3H).

**<sup>13</sup>C NMR** (125 MHz, CDCl<sub>3</sub>)  $\delta$  193.6, 136.4, 131.4, 125.4, 123.7, 122.7, 122.4, 118.7, 111.3, 27.6.

**GC-MS** (EI, 70 eV) *m/z* 159 (50, [M<sup>+</sup>]).

### 3-Propionylindole<sup>1</sup>

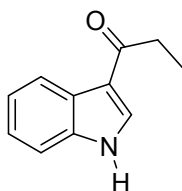

**<sup>1</sup>H NMR** (500 MHz, CDCl<sub>3</sub>)  $\delta$  8.70 (br s, 1H), 8.41–8.40 (m, 1H), 7.88 (s, 1H), 7.43–7.41 (m, 1H), 7.30–7.28 (m, 2H), 2.93 (q, *J* = 7.4 Hz, 2H), 1.28 (t, *J* = 7.4 Hz, 3H).

**<sup>13</sup>C NMR** (125 MHz, CDCl<sub>3</sub>)  $\delta$  197.1, 136.3, 130.9, 125.6, 123.7, 122.6, 122.5, 117.9, 111.4, 33.1, 9.0.

**GC-MS** (EI, 70 eV) *m/z* 173 (25, [M<sup>+</sup>]).

### 3-Butyrylindole<sup>2</sup>

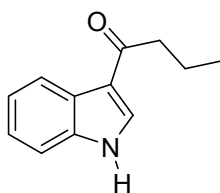

**<sup>1</sup>H NMR** (500 MHz, CDCl<sub>3</sub>) δ 8.85 (br s, 1H), 8.43–8.41 (m, 1H), 7.88 (d, *J* = 2.6 Hz, 1H), 7.43–7.41 (m, 1H), 7.30–7.28 (m, 2H), 2.86 (t, *J* = 7.4, 2H), 1.83 (hept, *J* = 7.4 Hz, 2H), 1.02 (t, *J* = 7.4 Hz, 3H).

**<sup>13</sup>C NMR** (125 MHz, CDCl<sub>3</sub>) δ 196.7, 136.4, 131.1, 125.5, 123.7, 122.6, 122.5, 118.3, 111.4, 41.9, 18.6, 14.1.

**GC–MS** (EI, 70 eV) *m/z* 187 (25, [M<sup>+</sup>]).

### 3-Isobutyrylindole<sup>1</sup>

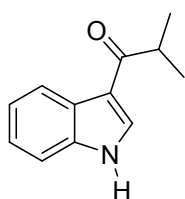

**<sup>1</sup>H NMR** (300 MHz, DMSO-*d*<sub>6</sub>) δ 11.90 (br s, 1H), 8.34 (s, 1H), 8.24–8.19 (m, 1H), 7.48–7.45 (m, 1H), 7.23–7.14 (m, 2H), 3.45 (hept, *J* = 6.8 Hz, 1H), 1.11 (d, *J* = 6.8 Hz, 6H).

**<sup>13</sup>C NMR** (75 MHz, DMSO-*d*<sub>6</sub>) δ 199.4, 136.7, 133.4, 125.7, 122.7, 121.6, 121.5, 114.9, 112.0, 35.8, 19.8.

**GC–MS** (EI, 70 eV) *m/z* 187 (25, [M<sup>+</sup>]).

### 3-Pivaloylindole<sup>1</sup>

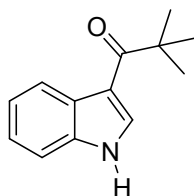

**<sup>1</sup>H NMR** (300 MHz, DMSO-*d*<sub>6</sub>) δ 11.84 (br s, 1H), 8.34 (s, 1H), 8.29–8.26 (m, 1H), 7.46–7.43 (m, 1H), 7.21–7.11 (m, 2H), 1.34 (s, 9H).

**<sup>13</sup>C NMR** (75 MHz, DMSO-*d*<sub>6</sub>) δ 201.1, 135.6, 132.4, 127.2, 122.5, 122.0, 121.4, 112.2, 111.7, 43.4, 28.6.

**GC-MS** (EI, 70 eV)  $m/z$  201 (15,  $[M^+]$ ).

### 3-Benzoylindole<sup>1,2</sup>

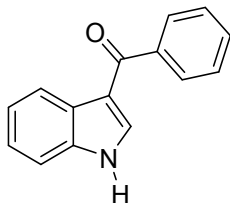

**<sup>1</sup>H NMR** (500 MHz, CDCl<sub>3</sub>)  $\delta$  8.65 (br s, 1H), 8.43 (dd,  $J = 6.2, 2.9$  Hz, 1H), 7.84 (dd,  $J = 8.2, 1.3$  Hz, 2H), 7.69 (d,  $J = 2.7$  Hz, 1H), 7.58 – 7.54 (m, 1H), 7.50–7.44 (m, 3H), 7.35–7.33 (m, 2H).

**<sup>13</sup>C NMR** (125 MHz, CDCl<sub>3</sub>)  $\delta$  207.8, 140.7, 136.3, 133.5, 131.3, 128.8, 128.3, 126.40, 124.0, 122.8, 122.6, 111.3.

**GC-MS** (EI, 70 eV)  $m/z$  221 (50,  $[M^+]$ ).

### 3-Acetyl-5-methylindole<sup>3</sup>

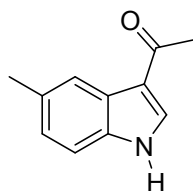

**<sup>1</sup>H NMR** (500 MHz, CDCl<sub>3</sub>)  $\delta$  8.57 (br s, 1H), 8.20 (s, 1H), 7.82 (d,  $J = 2.3$  Hz, 1H), 7.30 (d,  $J = 8.3$  Hz, 1H), 7.11 (m, 1H), 2.54 (s, 3H), 2.48 (s, 3H).

**<sup>13</sup>C NMR** (125 MHz, CDCl<sub>3</sub>)  $\delta$  193.6, 134.6, 132.3, 131.5, 125.7, 125.3, 122.1, 118.3, 110.9, 27.6, 21.6.

**GC-MS** (EI, 70 eV)  $m/z$  173 (50,  $[M^+]$ ).

### 3-Propionyl-5-methylindole

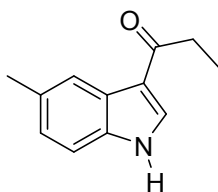

Pale yellow solid mp. 208-209 °C

**<sup>1</sup>H NMR** (300 MHz, DMSO-*d*<sub>6</sub>)  $\delta$  11.75 (s, 1H), 8.23 (s, 1H), 8.041 (m, 1H), 7.34 (d, *J* = 8.3 Hz, 1H), 7.02 (m, 1H), 2.84 (q, *J* = 7.4 Hz, 2H), 2.38 (s, 3H), 1.10 (t, *J* = 7.4 Hz, 3H).

**<sup>13</sup>C NMR** (75 MHz, DMSO-*d*<sub>6</sub>)  $\delta$  195.7, 134.9, 133.4, 130.2, 125.7, 124.1, 121.1, 115.6, 111.6, 31.7, 21.3, 9.2.

**GC-MS** (EI, 70 eV) *m/z* 187 ([M<sup>+</sup>]).

**HRMS** (ESI) *m/z* calcd for ([M+Na]<sup>+</sup>) C<sub>12</sub>H<sub>13</sub>NONa<sup>+</sup> 210.0889, found 210.0917

### 3-Isobutyryl-5-methylindole

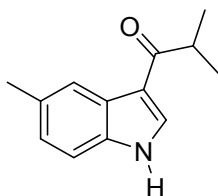

Pale yellow solid mp. 210-211 °C

**<sup>1</sup>H NMR** (300 MHz, DMSO-*d*<sub>6</sub>)  $\delta$  11.76 (s, 1H), 8.26 (m, 1H), 8.00 (s, 1H), 7.31 (d, *J* = 8.3 Hz, 1H), 7.00 (m, 1H), 3.41 (hept, *J* = 6.8 Hz, 1H), 2.36 (s, 3H), 1.09 (d, *J* = 6.8 Hz, 6H).

**<sup>13</sup>C NMR** (75 MHz, DMSO-*d*<sub>6</sub>)  $\delta$  199.2, 135.0, 133.5, 130.3, 126.0, 124.1, 121.2, 114.6, 111.5, 35.7, 21.3, 19.8.

**GC-MS** (EI, 70 eV) *m/z* 201 ([M<sup>+</sup>]).

**HRMS** (ESI) *m/z* calcd for ([M+Na]<sup>+</sup>) C<sub>12</sub>H<sub>14</sub>NONa<sup>+</sup> 224.1046, found 224.1063

### 3-Acetyl-5-methoxyindole<sup>3</sup>



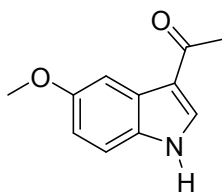

**<sup>1</sup>H NMR** (500 MHz, CDCl<sub>3</sub>)  $\delta$  8.54 (br s, 1H), 7.90 (d,  $J$  = 2.5 Hz, 1H), 7.81 (d,  $J$  = 3.1 Hz, 1H), 7.29 (d,  $J$  = 8.8 Hz, 1H), 6.93 (dd,  $J$  = 8.8, 2.5 Hz, 1H), 3.90 (s, 3H), 2.53 (s, 3H).

**<sup>13</sup>C NMR** (125 MHz, CDCl<sub>3</sub>)  $\delta$  193.5, 156.4, 131.6, 126.2, 117.4, 114.4, 112.0, 106.7, 103.7, 55.8, 27.4.

**GC-MS** (EI, 70 eV)  $m/z$  189 (50, [M<sup>+</sup>]).

### 3-Isobutyryl-5-methoxyindole

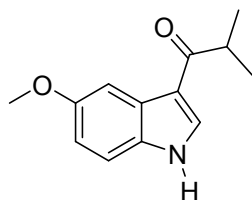

White solid, mp. 158-159 °C

**<sup>1</sup>H NMR** (500 MHz, CDCl<sub>3</sub>)  $\delta$  8.77 (s, 1H), 7.97 (m, 1H), 7.85 (m, 1H), 7.29 (d,  $J$  = 8.8 Hz, 1H), 6.92 (m, 1H), 3.87 (s, 3H), 3.32 (hept,  $J$  = 6.8 Hz, 1H), 1.26 (d,  $J$  = 6.8 Hz, 7H).

**<sup>13</sup>C NMR** (125 MHz, CDCl<sub>3</sub>)  $\delta$  201.1, 156.4, 131.2, 131.0, 126.7, 116.5, 114.4, 112.1, 103.6, 55.7, 37.1, 19.8.

**GC-MS** (EI, 70 eV)  $m/z$  217 (25, [M<sup>+</sup>]).

**HRMS** (ESI)  $m/z$  calcd for ([M+Na]<sup>+</sup>) C<sub>13</sub>H<sub>15</sub>NO<sub>2</sub>Na<sup>+</sup> 240.0995, found 240.1035

### 3-Acetyl-5-fluoroindole<sup>4</sup>

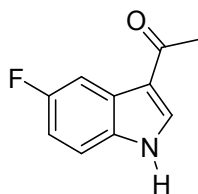

**<sup>1</sup>H NMR** (500 MHz, CDCl<sub>3</sub>)  $\delta$  8.56 (br s, 1H), 8.20 (dd,  $J$  = 2.5 Hz, 1H), 7.97 (d,  $J$  = 3.0 Hz, 1H), 7.32 (dd,  $J$  = 4.5 Hz, 4.0 Hz, 1H), 7.02 (dt,  $J$  = 2.5 Hz, 1H), 1.42 (s, 3H).

**<sup>13</sup>C NMR** (125 MHz, CDCl<sub>3</sub>)  $\delta$  202.3, 159.7 (d,  $J$  = 235.5 Hz), 131.7, 131.1, 112.1 (d,  $J$  = 26.5 Hz), 111.6 (d,  $J$  = 9.8 Hz), 111.5, 108.7, 108.5, 28.8.

**GC-MS** (EI, 70 eV)  $m/z$  177 (50, [M<sup>+</sup>]).

### 3-Propionyl-5-fluoroindole<sup>4</sup>

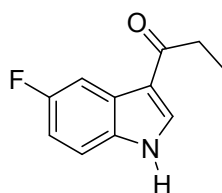

**<sup>1</sup>H NMR** (500 MHz, CDCl<sub>3</sub>)  $\delta$  8.64 (s, 1H), 8.08 (dd,  $J$  = 9.7, 2.5 Hz, 1H), 7.90 (d,  $J$  = 2.5 Hz, 1H), 7.33 (dd,  $J$  = 8.8, 4.3 Hz, 1H), 7.03 (td,  $J$  = 8.9, 2.5 Hz, 1H), 2.90 (q,  $J$  = 7.4 Hz, 2H), 1.26 (t,  $J$  = 7.4 Hz, 3H).

**<sup>13</sup>C NMR** (125 MHz, CDCl<sub>3</sub>)  $\delta$  196.6, 159.6 (d,  $J$  = 239.4 Hz), 132.3 (d,  $J$  = 20.8 Hz), 126.3 (d,  $J$  = 11.1 Hz), 118.1, 112.2 (d,  $J$  = 25.0 Hz), 107.9 (d,  $J$  = 25.0 Hz), 32.9, 8.8.

**GC-MS** (EI, 70 eV)  $m/z$  191 (25, [M<sup>+</sup>]).

### 3-Acetyl-5-chloroindole<sup>5,6</sup>

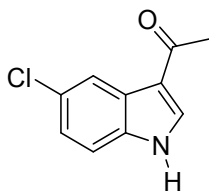

**<sup>1</sup>H NMR** (500 MHz, CDCl<sub>3</sub>)  $\delta$  8.63 (br s, 1H), 8.40 (d,  $J = 1.9$  Hz, 1H), 7.86 (s, 1H), 7.33 (d,  $J = 8.6$  Hz, 1H), 7.24 (d,  $J = 2.0$  Hz, 1H), 2.54 (s, 3H).

**<sup>13</sup>C NMR** (125 MHz, CDCl<sub>3</sub>)  $\delta$  193.1, 134.6, 132.1, 128.7, 126.5, 124.3, 122.1, 118.4, 112.3, 27.6.

**GC-MS** (EI, 70 eV)  $m/z$  193 (25, [M<sup>+</sup>]).

### 3-Propionyl-5-chloroindole<sup>7</sup>

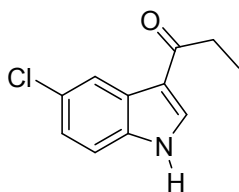

**<sup>1</sup>H NMR** (500 MHz, CDCl<sub>3</sub>)  $\delta$  8.57 (br s, 1H), 8.41 (d,  $J = 1.9$  Hz, 1H), 7.88 (d,  $J = 2.4$  Hz, 1H), 7.33 (d,  $J = 8.6$  Hz, 1H), 7.24 (m, 1H), 2.90 (q,  $J = 7.4$  Hz, 2H), 1.26 (t,  $J = 7.4$  Hz, 3H).

**<sup>13</sup>C NMR** (125 MHz, CDCl<sub>3</sub>)  $\delta$  196.5, 138.7, 137.3, 134.6, 131.3, 124.1, 122.2, 117.7, 112.2, 33.0, 29.7, 8.8.

**GC-MS** (EI, 70 eV)  $m/z$  207 (25, [M<sup>+</sup>]).

### 3-Butyryl-5-chloroindole

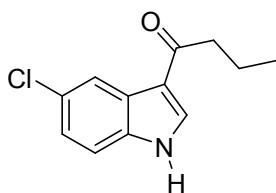

Pale yellow solid, mp. 214-215 °C

**<sup>1</sup>H NMR** (500 MHz, CDCl<sub>3</sub>) δ 8.60 (s, 1H), 8.42 (m, 1H), 7.87 (m, 1H), 7.33 (m, 1H), 7.24 (m, 1H), 2.83 (t, *J* = 7.4 Hz, 2H), 1.80 (m, 2H), 1.03 (t, *J* = 7.4 Hz, 3H).

**<sup>13</sup>C NMR** (125 MHz, CDCl<sub>3</sub>) δ 196.1, 134.6, 131.6, 130.2, 126.6, 124.1, 122.2, 118.1, 112.2, 41.7, 18.4, 14.0.

**GC-MS** (EI, 70 eV) *m/z* 221 (25, [M<sup>+</sup>]).

**HRMS** (ESI) *m/z* calcd for ([M+Na]<sup>+</sup>) C<sub>12</sub>H<sub>12</sub>ClNONa<sup>+</sup> 244.0499, found 244.0472

### 3-Isobutyryl-5-chloroindole

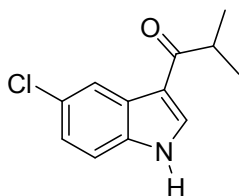

Pale yellow solid, mp. 198-199 °C

**<sup>1</sup>H NMR** (500 MHz, CDCl<sub>3</sub>) δ 8.66 (s, 1H), 8.44 (m, 1H), 7.89 (d, *J* = 2.7 Hz, 1H), 7.33 (d, *J* = 8.6 Hz, 1H), 7.24 (m, 1H), 3.31 (hept, *J* = 6.8 Hz, 1H), 1.26 (d, *J* = 6.8 Hz, 6H).

**<sup>13</sup>C NMR** (125 MHz, CDCl<sub>3</sub>) δ 200.4, 134.7, 131.3, 128.6, 127.0, 124.1, 122.3, 116.7, 112.2, 37.3, 19.6.

**GC-MS** (EI, 70 eV) *m/z* 221 (25, [M<sup>+</sup>]).

**HRMS** (ESI) *m/z* calcd for ([M+Na]<sup>+</sup>) C<sub>12</sub>H<sub>11</sub>ClNONa<sup>+</sup> 244.0499, found 244.0537

### 3-Pivaloyl-5-chloroindole<sup>8</sup>

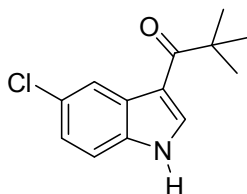

**<sup>1</sup>H NMR** (500 MHz, CDCl<sub>3</sub>) δ 8.62 (br s, 1H), 8.53 (d, *J* = 2.0 Hz, 1H), 7.95 (d, *J* = 3.0 Hz, 1H), 7.31 (d, *J* = 8.6 Hz, 1H), 7.23 (dd, *J* = 8.6, 2.0 Hz, 1H), 1.41 (s, 9H).

**<sup>13</sup>C NMR** (125 MHz, CDCl<sub>3</sub>) δ 202.3, 133.6, 130.7, 128.6, 128.5, 124.1, 122.9, 114.2, 111.9, 44.2, 28.8.

**GC-MS** (EI, 70 eV) *m/z* 235 (15, [M<sup>+</sup>]).

### 3-Benzoyl-5-chloroindole<sup>9</sup>

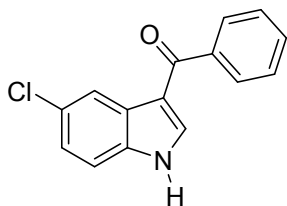

**<sup>1</sup>H NMR** (500 MHz, CDCl<sub>3</sub>) δ 8.66 (br s, 1H), 8.44 (d, *J* = 1.8 Hz, 1H), 7.83–7.82 (m, 2H), 7.70 (d, *J* = 2.7 Hz, 1H), 7.56 (m, 1H), 7.50 (m, 2H), 7.37 (d, *J* = 8.7 Hz, 1H), 7.29 (dd, *J* = 8.6, 2.0 Hz, 1H).

**<sup>13</sup>C NMR** (125 MHz, CDCl<sub>3</sub> and DMSO-*d*<sub>6</sub>) δ 195.6, 145.3, 140.7, 140.6, 140.2, 136.0, 133.3, 133.1, 132.4, 128.3, 126.3, 120.4, 118.0.

**GC-MS** (EI, 70 eV) *m/z* 255 (60, [M<sup>+</sup>]).

### 3-Propionyl-5-bromoindole<sup>10</sup>

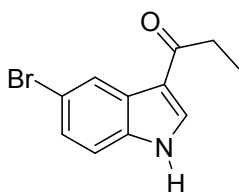

**<sup>1</sup>H NMR** (300 MHz, DMSO-*d*<sub>6</sub>) δ 12.06 (s, 1H), 8.35 (s, 1H), 8.31 (d, *J* = 2.0 Hz, 1H), 7.41 (d, *J* = 8.6 Hz, 1H), 7.31 (m, 1H), 2.85 (q, *J* = 7.4 Hz, 2H), 1.08 (t, *J* = 7.4 Hz, 3H).

**<sup>13</sup>C NMR** (75 MHz, DMSO-*d*<sub>6</sub>) δ 196.4, 135.8, 135.2, 127.6, 125.7, 123.9, 115.9, 114.8, 114.6, 32.3, 9.4.

**GC-MS** (EI, 70 eV)  $m/z$  253 (25, [M<sup>+</sup>]).

### 3-Pivaloyl-5-bromoindole

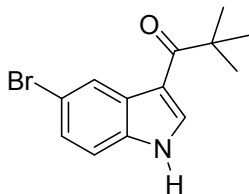

White solid, mp. 234-235 °C

**<sup>1</sup>H NMR** (300 MHz, DMSO-*d*<sub>6</sub>)  $\delta$  12.04 (s, 1H), 8.42 (m, 1H), 8.40 (s, 1H), 7.41 (dd,  $J$  = 8.6, 0.5 Hz, 1H), 7.30 (m, 1H), 1.31 (s, 9H).

**<sup>13</sup>C NMR** (75 MHz, DMSO-*d*<sub>6</sub>)  $\delta$  201.1, 134.3, 133.5, 128.9, 125.0, 124.1, 114.2, 113.7, 111.6, 43.3, 28.3.

**GC-MS** (EI, 70 eV)  $m/z$  279 (15, [M<sup>+</sup>]).

**HRMS** (ESI)  $m/z$  calcd for ([M+Na]<sup>+</sup>) C<sub>13</sub>H<sub>14</sub>BrNONa<sup>+</sup> 302.0151, found 302.0186

### 3-Propionyl-4-bromoindole

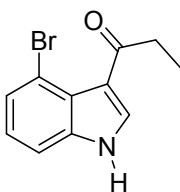

Reddish brown solid, mp. 112-113 °C

**<sup>1</sup>H NMR** (500 MHz, CDCl<sub>3</sub>)  $\delta$  9.59 (s, 1H), 7.40 (m, 1H), 7.33 (m, 1H), 7.24 (dd,  $J$  = 2.3, 0.9 Hz, 1H), 7.19 (m, 1H), 3.04 (q,  $J$  = 7.4 Hz, 2H), 1.30 (t,  $J$  = 7.4 Hz, 3H).

**<sup>13</sup>C NMR** (125 MHz, CDCl<sub>3</sub>)  $\delta$  194.1, 137.4, 135.1, 128.5, 126.8, 123.7, 116.8, 111.5, 108.9, 31.6, 8.6.

**GC-MS** (EI, 70 eV)  $m/z$  251 (70, [M<sup>+</sup>]).

**HRMS** (ESI)  $m/z$  calcd for ([M+Na]<sup>+</sup>) C<sub>11</sub>H<sub>9</sub>BrNONa<sup>+</sup> 273.9838, found 273.9814

### 3-Pivaloyl-4-bromoindole

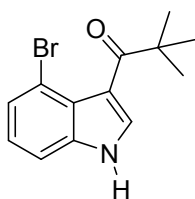

Pale yellow solid, mp. 154 °C

<sup>1</sup>H NMR (500 MHz, CDCl<sub>3</sub>) δ 9.37 (s, 1H), 7.37 (d, *J* = 8.3 Hz, 1H), 7.32 (m, 1H), 7.25 (dd, *J* = 2.3, 0.9 Hz, 1H), 7.17 (m, 1H), 1.48 (s, 9H).

<sup>13</sup>C NMR (125 MHz, CDCl<sub>3</sub>) δ 199.0, 136.1, 132.5, 128.7, 126.6, 123.6, 116.8, 111.2, 108.8, 43.5, 28.4.

GC-MS (EI, 70 eV) *m/z* 279 (40, [M<sup>+</sup>]).

HRMS (ESI) *m/z* calcd for ([M+Na]<sup>+</sup>) C<sub>13</sub>H<sub>14</sub>BrNONa<sup>+</sup> 302.0151, found 302.0189

#### Section S5. Reference

1. Stalick, W. M.; Wynne, J. H.; Jensen, S. D.; Boson, S. *Synthesis* **2004**, 2004, 2277-2282.
2. Das, T.; Chakraborty, A.; Sarkar, A. *Tetrahedron Letters* **2014**, 55, 7198-7202.
3. Xing, Q.; Li, P.; Lv, H.; Lang, R.; Xia, C.; Li, F., *Chem. Commun.* **2014**, 50, 12181-12184.
4. Jiang, T.-S.; Wang, G.-W. *Org. Lett.* **2013**, 15, 788-791.
5. Guchhait, S. K.; Kashyap, M.; Kamble, H. *J. Org. Chem.* **2011**, 76, 4753-4758.
6. (a) Gorbunova, V. P.; Suvorov, N. N. *Khim. Geterotsykl. Soedin.* **1973**, 1519-1522; (b) Simon, G.; Couthon-Gourves, H.; Haelters, J.-P.; Corbel, B.; Kervarec, N.; Michaud, F.; Meijer, L. *J. Heterocycl. Chem.* **2007**, 44, 793-801. (c) Ashokgajapathiraju, P.; Sreeramulu, J.; Ravindranath, L. K. *World J. Pharm. Pharm. Sci.* **2014**, 3, 1473-1495; (d) Ferro, S.; De Luca, L.; Lo Surdo, G.; Morreale, F.; Christ, F.; Debyser, Z.; Gitto, R.; Chimirri, A. *Bioorg. Med. Chem.* **2014**, 22, 2269-2279.
7. Lamattina, J. L.; McCarthy, P. A.; Reiter, L. A. EP259085A1, 1988

8. 3-Indolyl ketones. GB869775, 1961.
9. (a) Wu, W.; Su, W. *J. Am. Chem. Soc.* **2011**, *133*, 11924-11927. (b) Ma, Y.; You, J.; Song, F. *Chem. Eur. J.* **2013**, *19*, 1189-1193. (c) Muller, R.; Mulani, I.; Basson, A. E.; Pribut, N.; Hassam, M.; Morris, L.; van Otterlo, W. A. L.; Pelly, S. C. *Bioorg. Med. Chem. Lett.* **2014**, *24*, 4376-4380.
10. Preobrazhenskaya, M. N.; Orlova, L. M.; Suvorov, N. N. *Zh. Vses. Khim. Obshchest.* **1968**, *13*, 236-237.



## Section S6. $^1\text{H}$ , $^{13}\text{C}$ NMR and HRMS spectra

### $^1\text{H}$ NMR, $^{13}\text{C}$ NMR, IR, and HR-ESI-MS of 1-(4-sulfobutyl)-3-methylimidazolium hydrogen sulfate (BAIL)

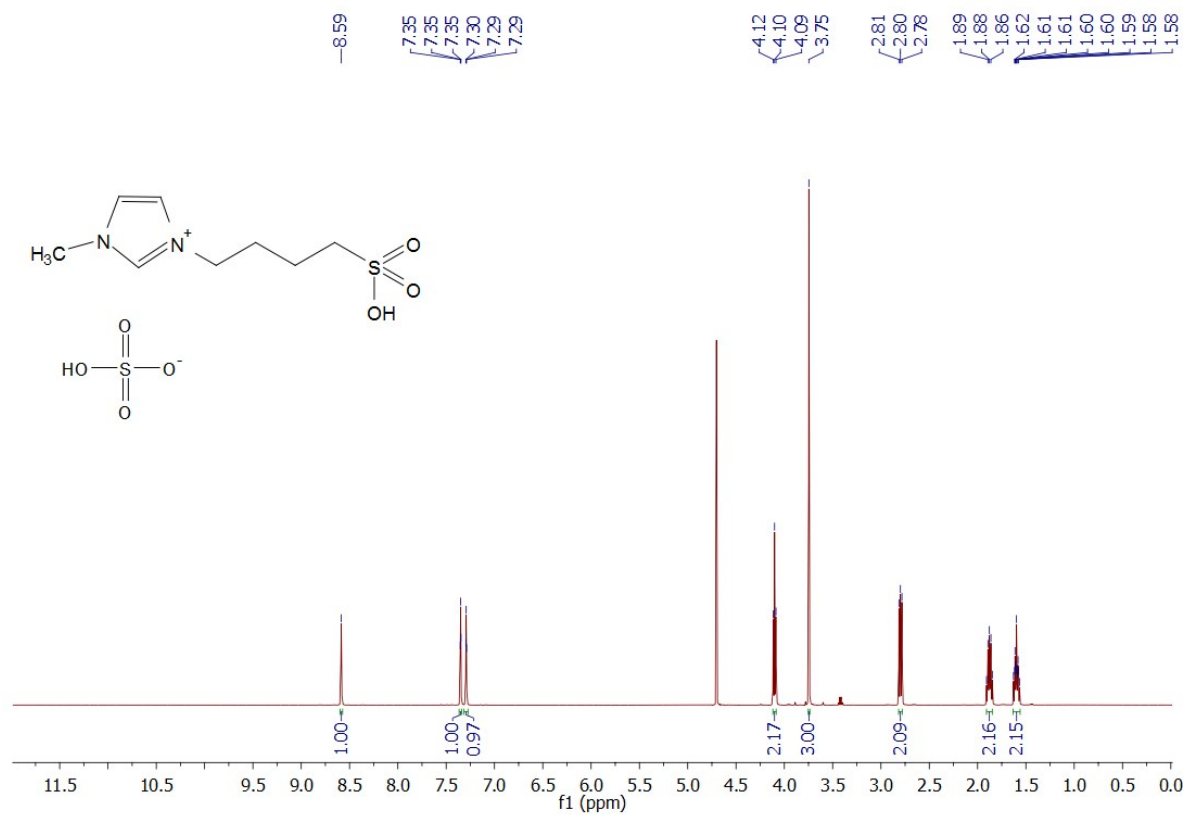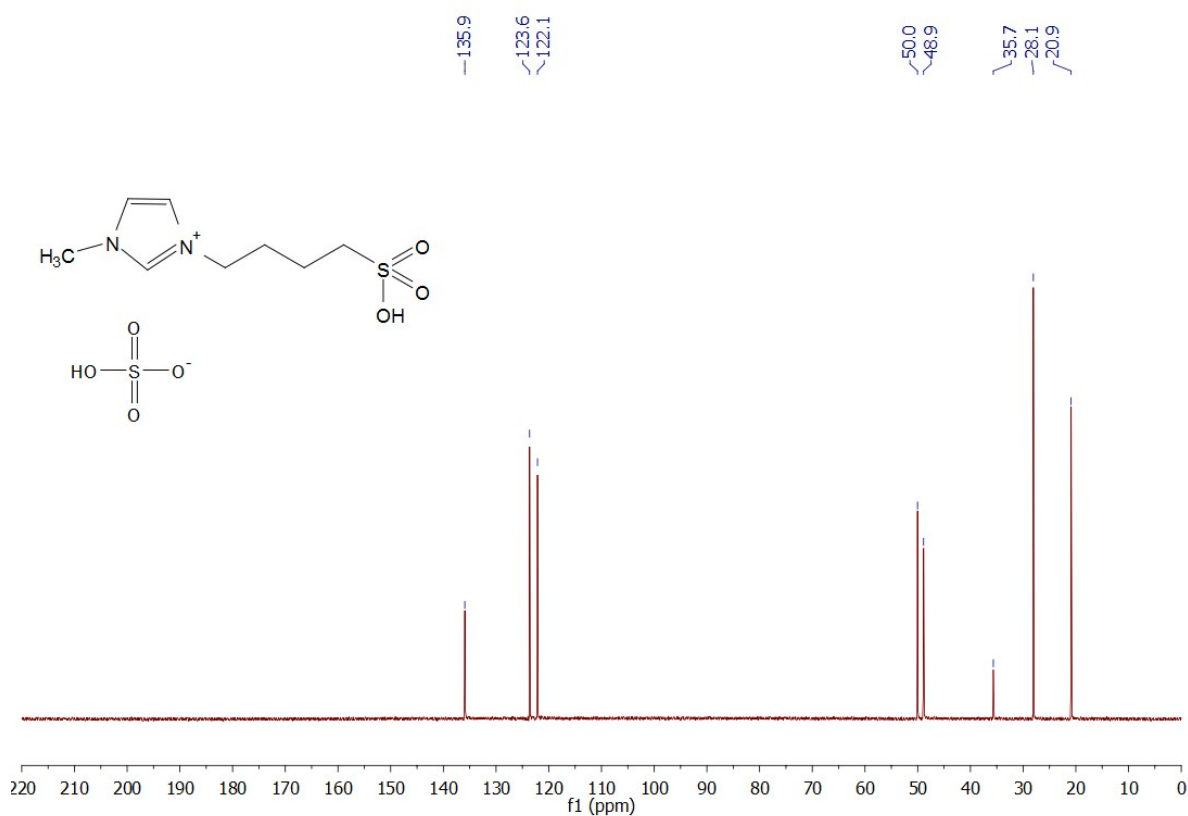

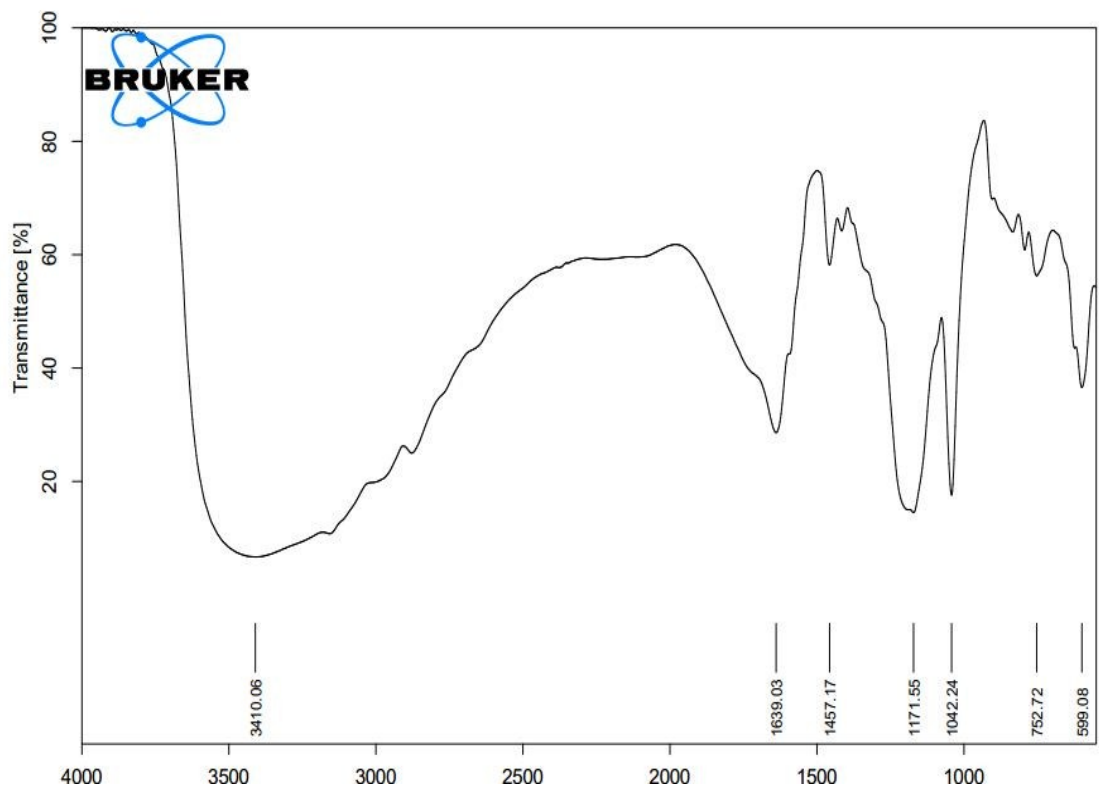

## Display Report

### Analysis Info

Analysis Name D:\Data\dm 2014\ILS\_1-B,2\_01\_14074.d  
Method protein m y mass tb.m  
Sample Name ILS  
Comment 10 ML CR3 QUA C18, RUA GIAI BANG 1 ML MEOH

Acquisition Date 1/9/2015 8:46:23 PM

Operator Mai  
Instrument micrOTOF-Q 10187

### Acquisition Parameter

|             |            |                       |           |                  |           |
|-------------|------------|-----------------------|-----------|------------------|-----------|
| Source Type | ESI        | Ion Polarity          | Positive  | Set Nebulizer    | 1.2 Bar   |
| Focus       | Not active | Set Capillary         | 4500 V    | Set Dry Heater   | 200 °C    |
| Scan Begin  | 100 m/z    | Set End Plate Offset  | -500 V    | Set Dry Gas      | 9.0 l/min |
| Scan End    | 3000 m/z   | Set Collision Cell RF | 200.0 Vpp | Set Divert Valve | Source    |

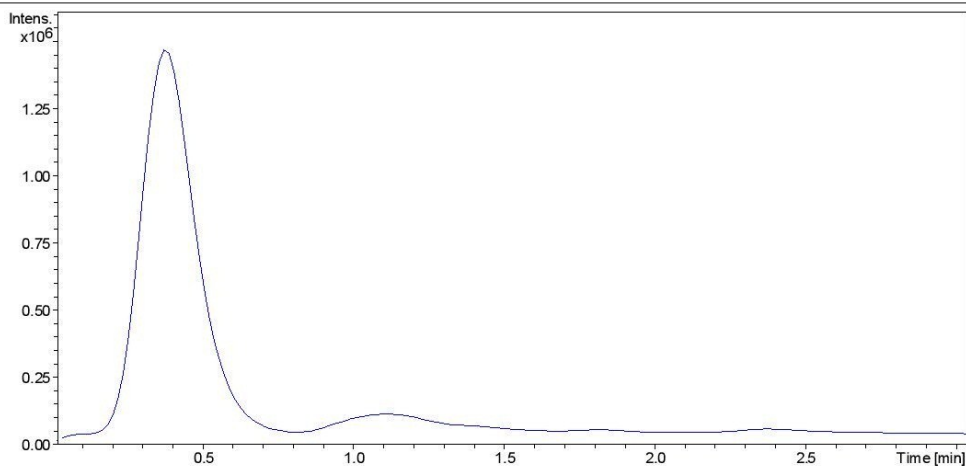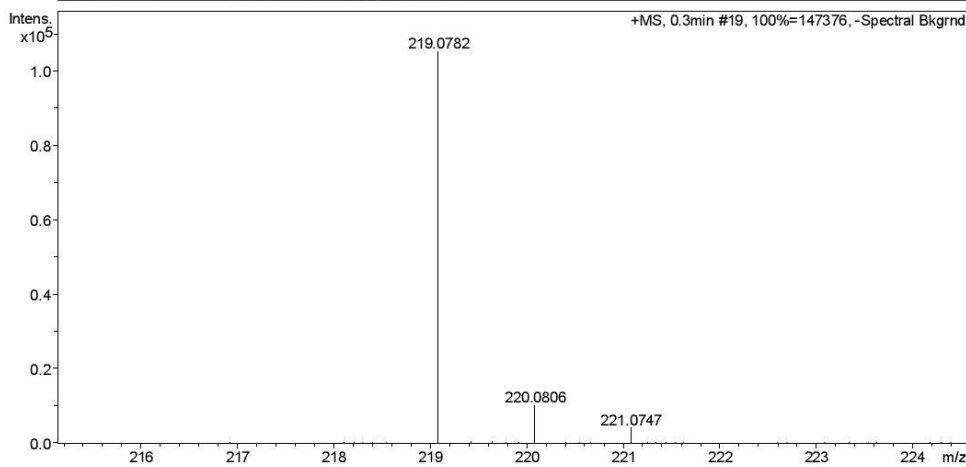

# $^1\text{H}$ NMR, $^{13}\text{C}$ NMR of 3-Acetylidole

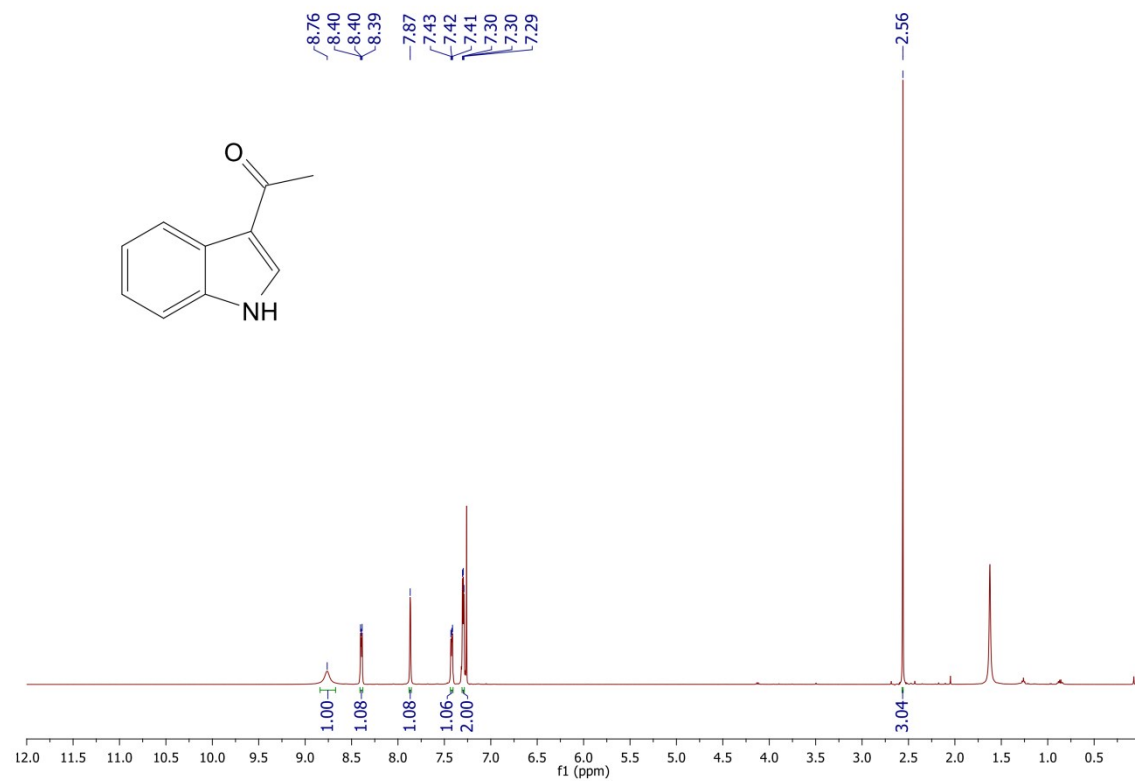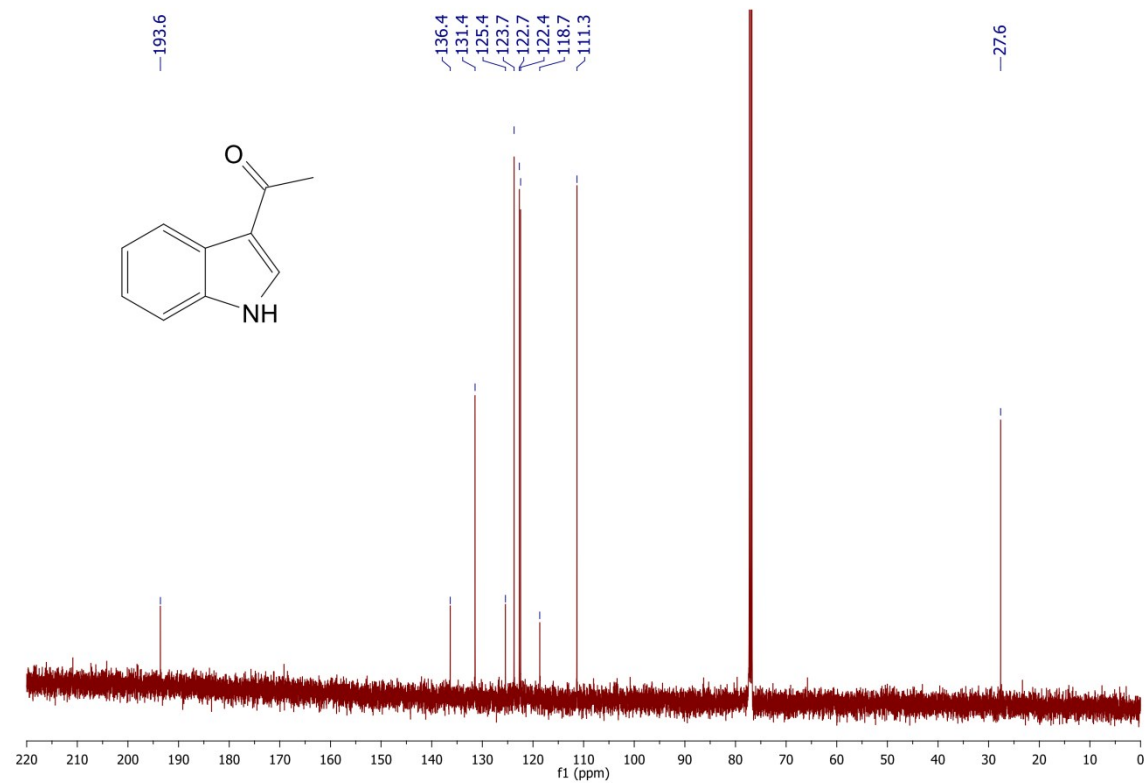

# $^1\text{H}$ NMR, $^{13}\text{C}$ NMR of 3-Propionylidole

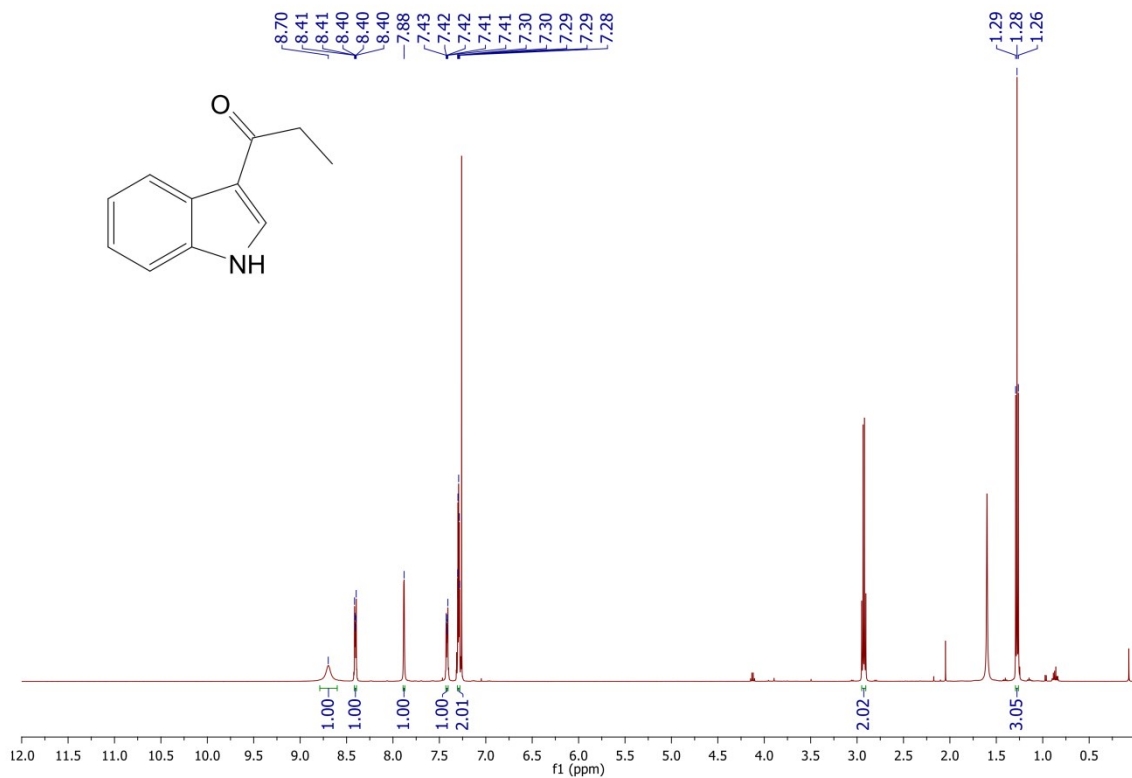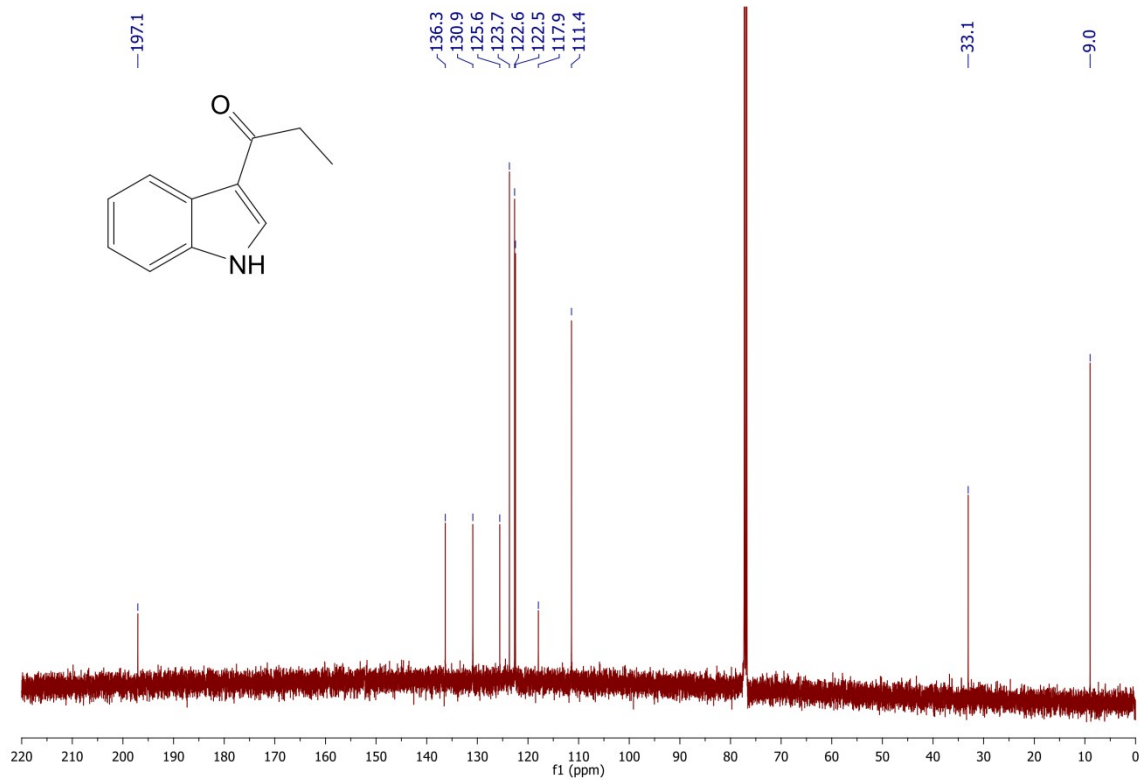

**<sup>1</sup>H NMR, <sup>13</sup>C NMR of 3-Butyrylindole**

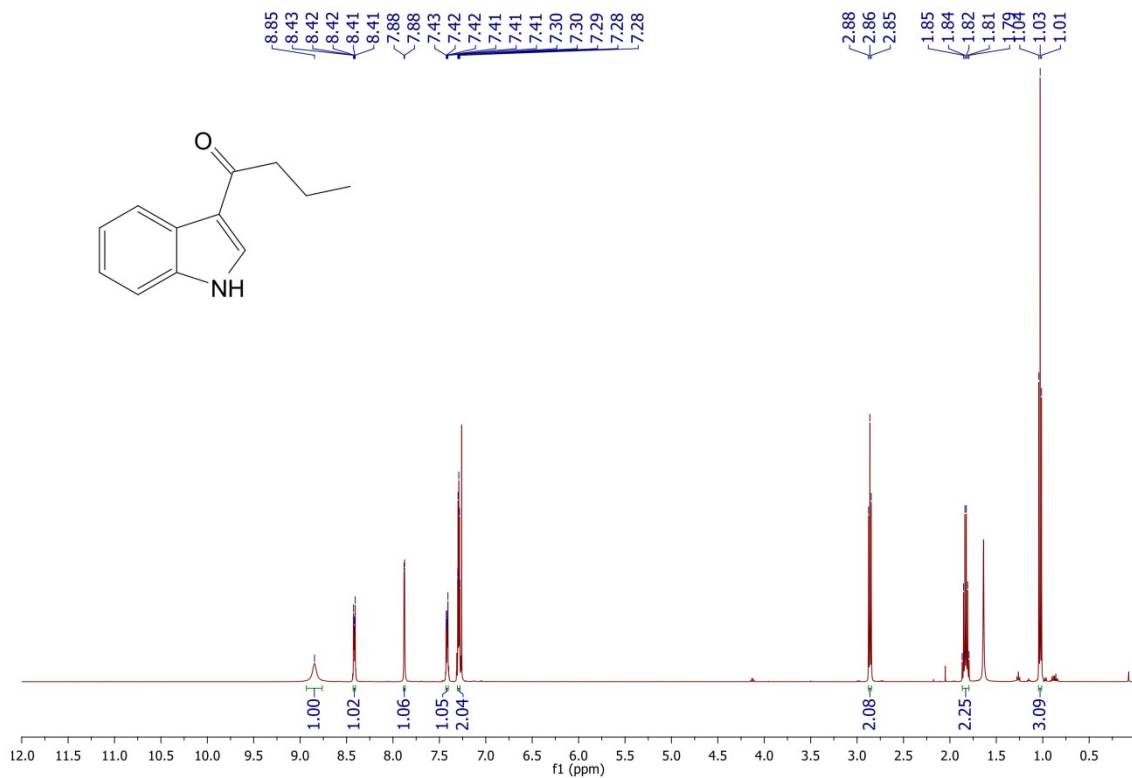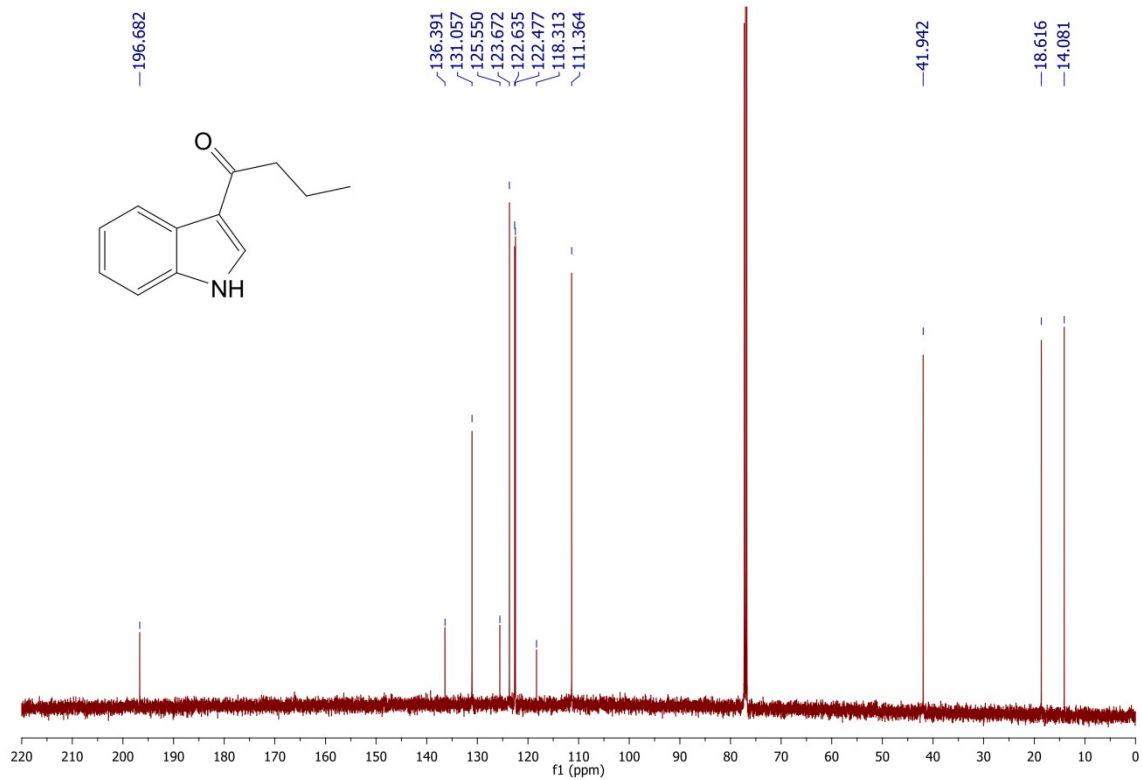

**$^1\text{H}$  NMR,  $^{13}\text{C}$  NMR of 3-Isobutyrylindole**

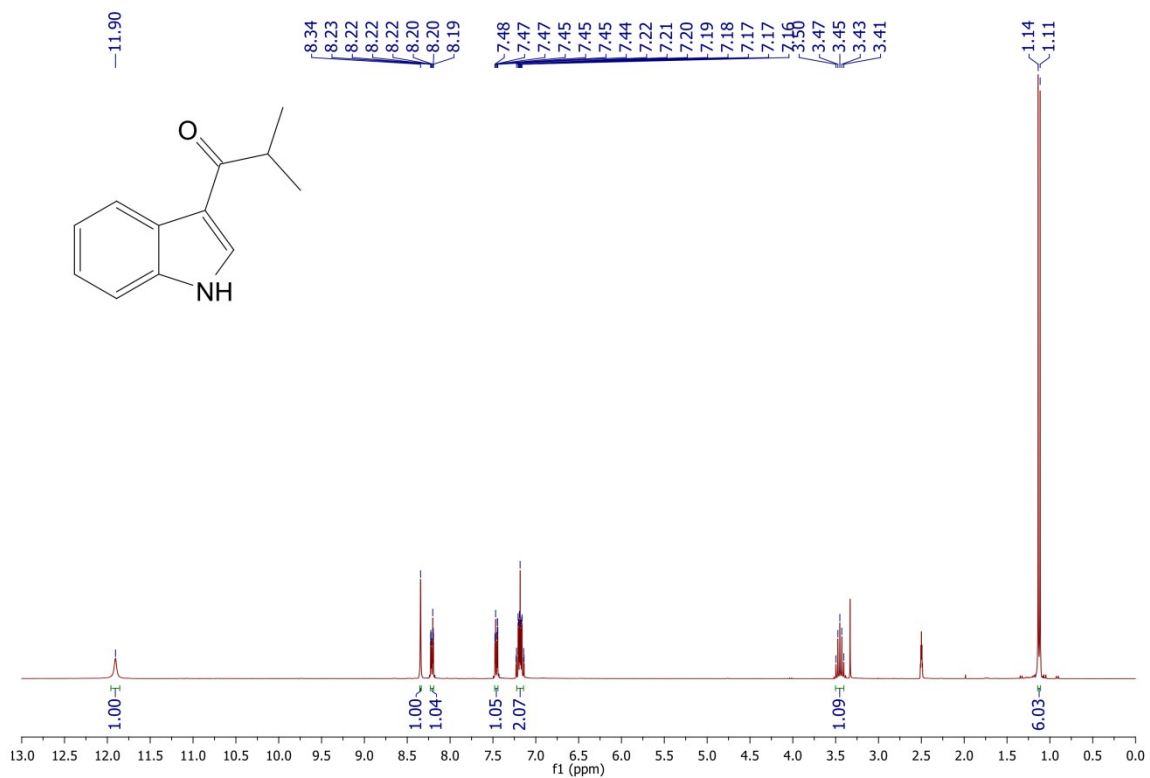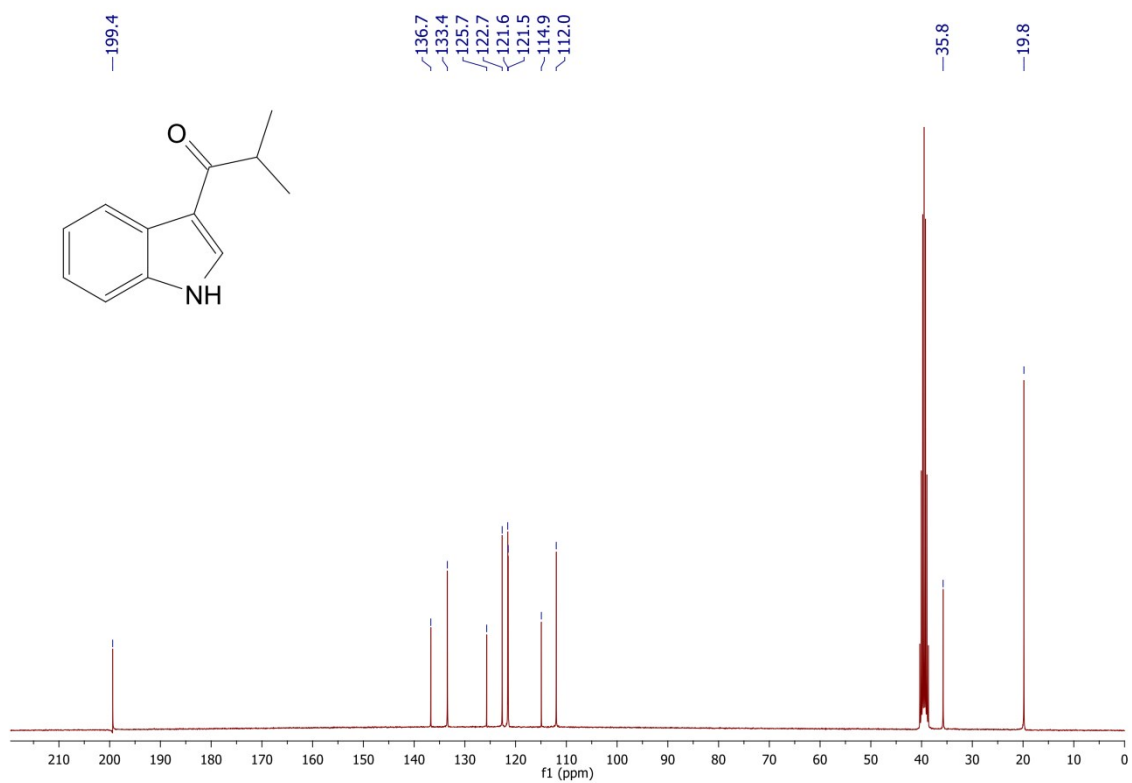

**<sup>1</sup>H NMR, <sup>13</sup>C NMR of 3-Pivaloylindole**

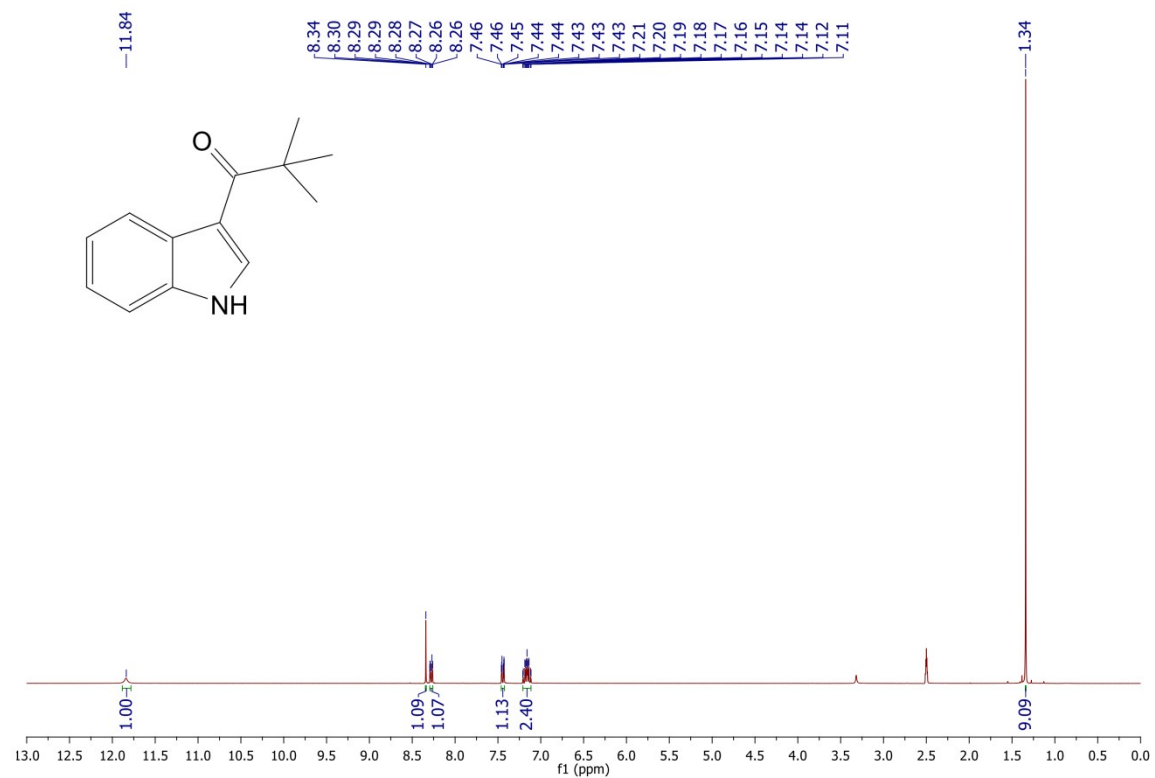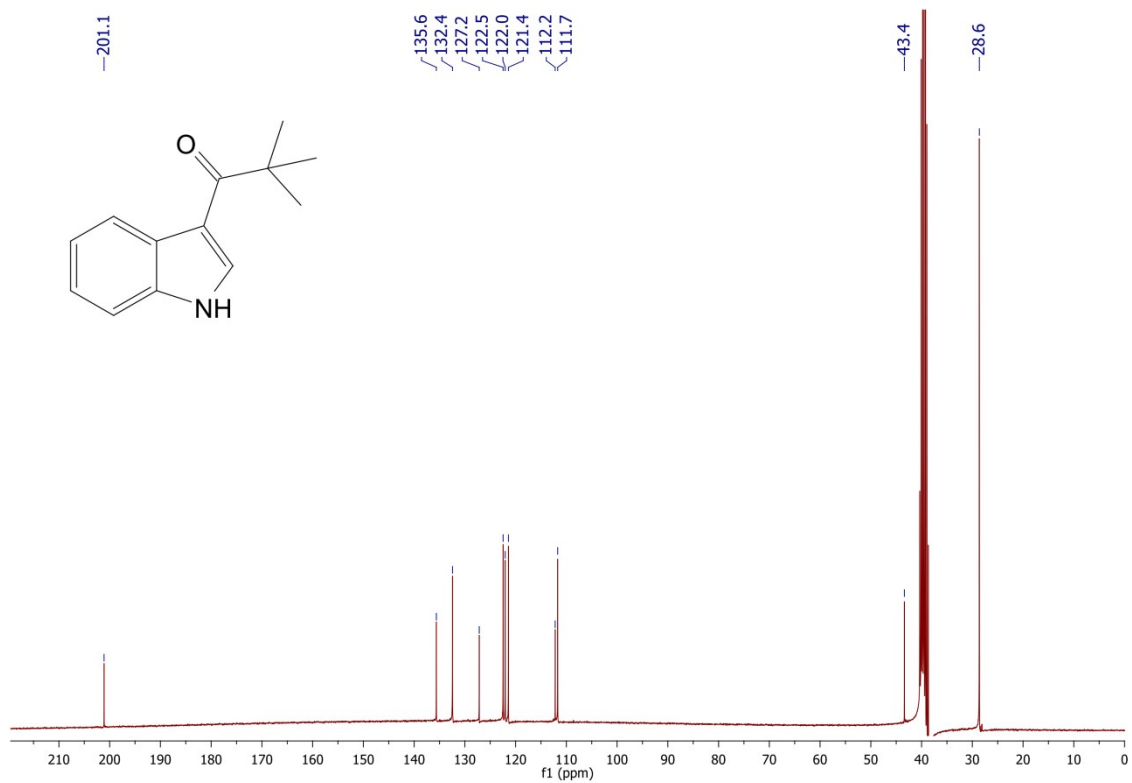

$^1\text{H}$  NMR,  $^{13}\text{C}$  NMR of 3-Benzoylindole





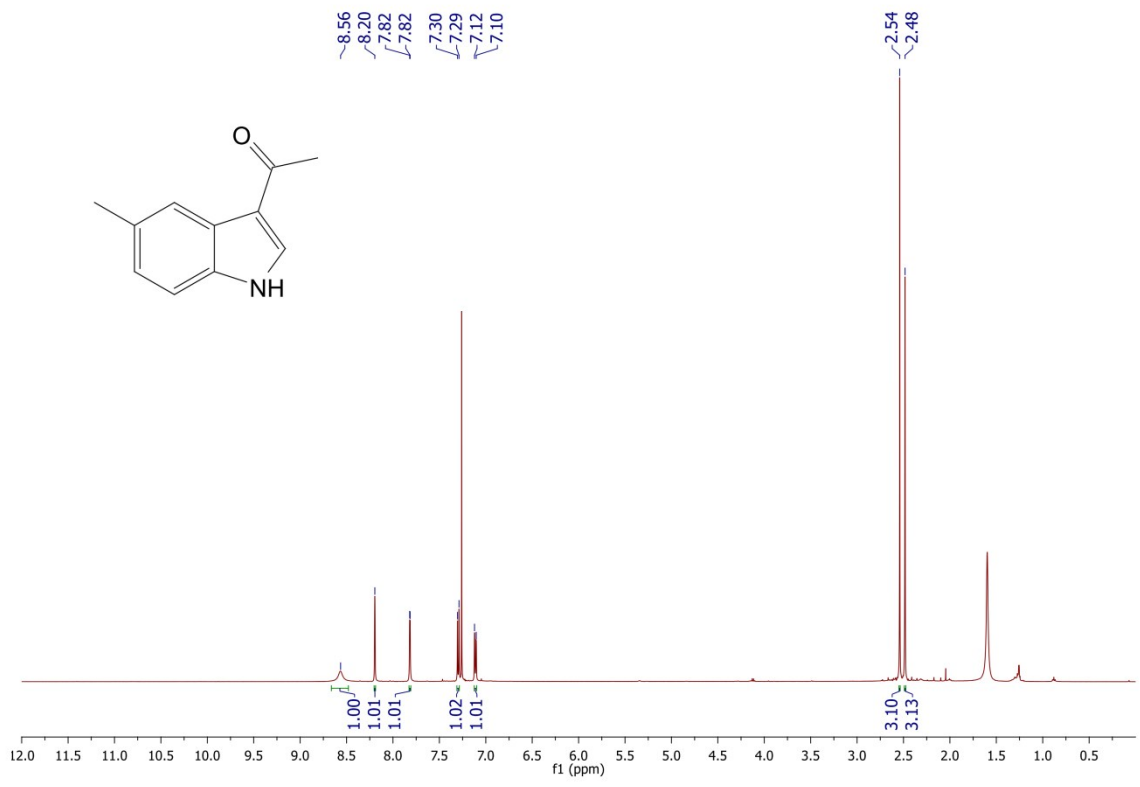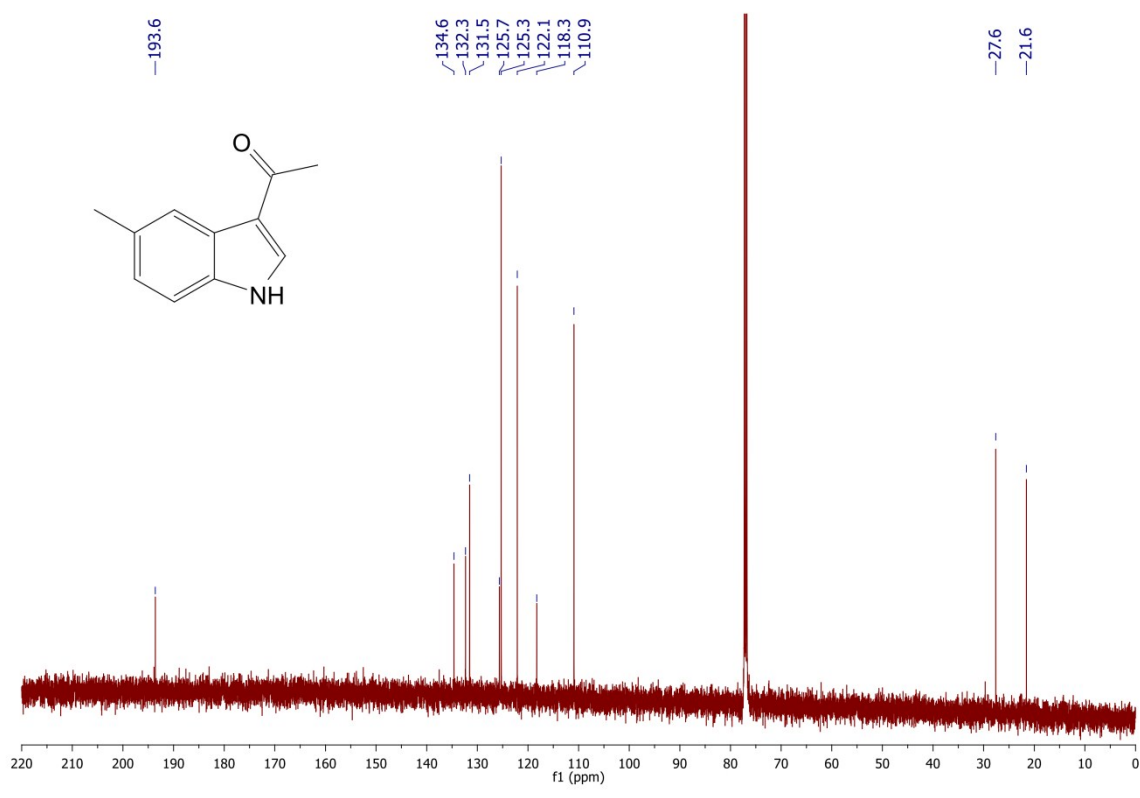

**<sup>1</sup>H NMR, <sup>13</sup>C NMR and HR-MS of 3-Propionyl-5-methylindole**

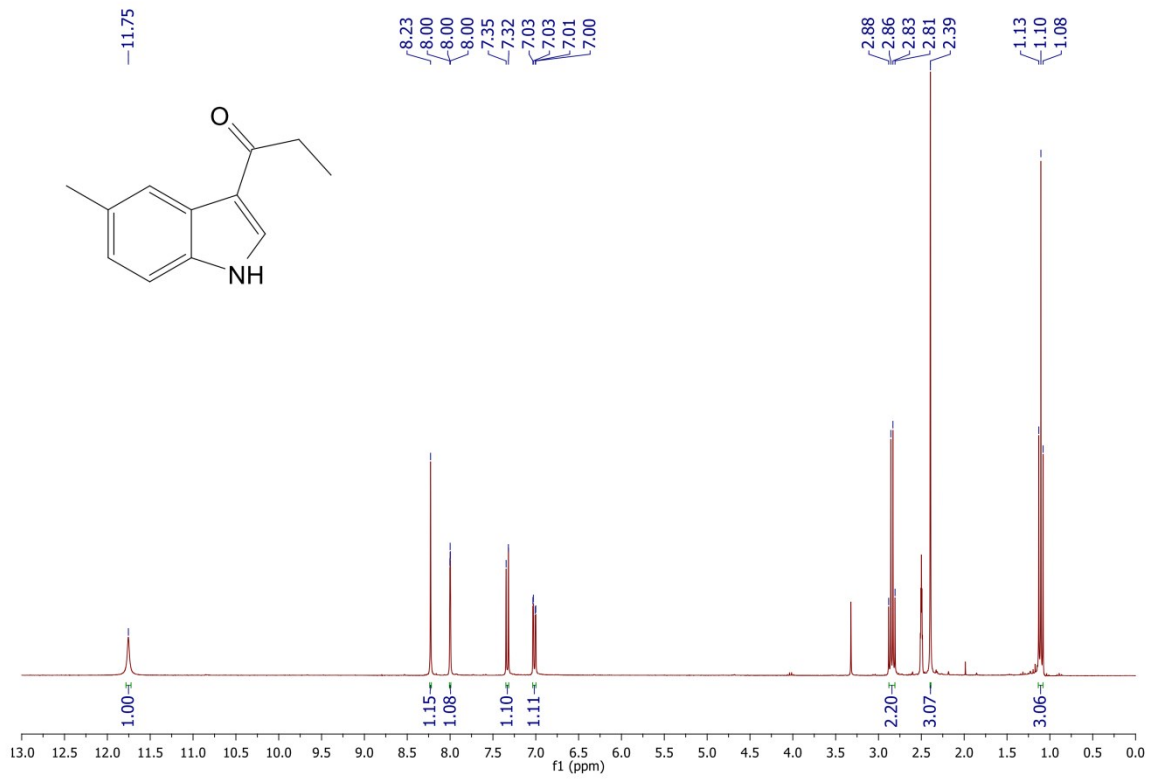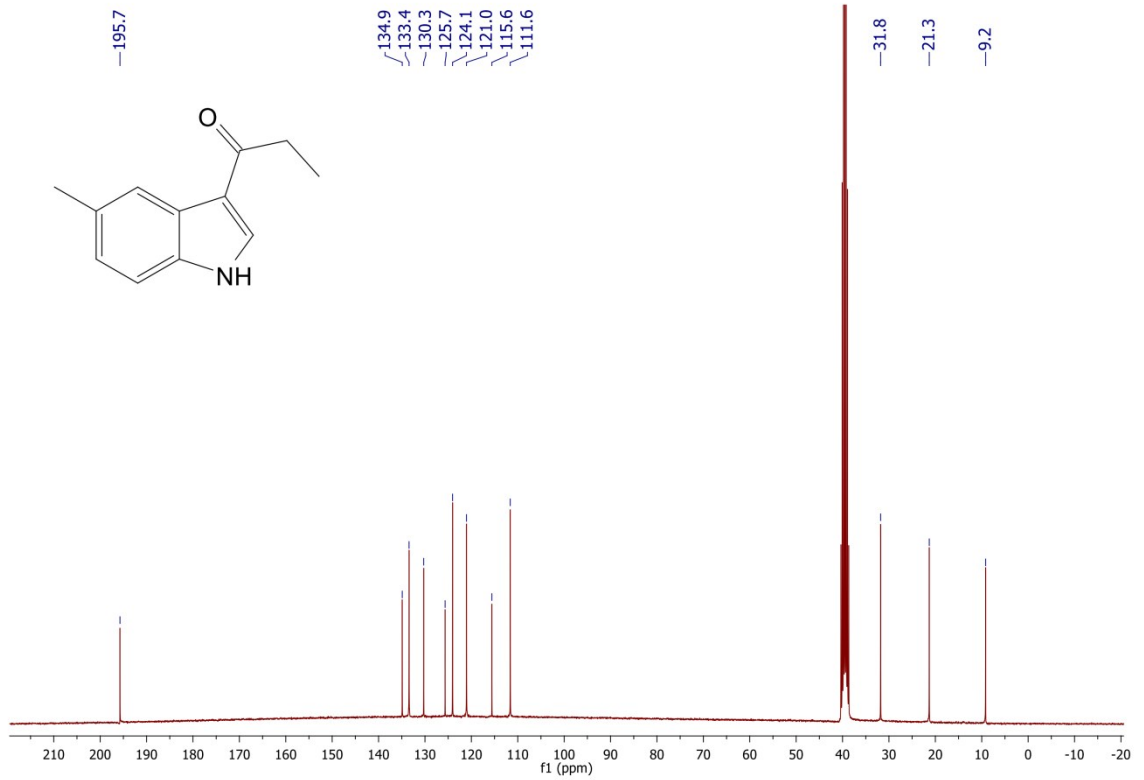

## Display Report

|                      |                                         |                  |                      |
|----------------------|-----------------------------------------|------------------|----------------------|
| <b>Analysis Info</b> |                                         | Acquisition Date | 3/28/2015 3:49:49 PM |
| Analysis Name        | D:\Data\dmm 2015\ME-PR_1-a,1_01_15132.d | Operator         | Mai                  |
| Method               | dmm.m                                   | Instrument       | micrOTOF-Q 10187     |
| Sample Name          | ME-PR                                   |                  |                      |
| Comment              |                                         |                  |                      |

|                              |            |                       |           |                  |           |
|------------------------------|------------|-----------------------|-----------|------------------|-----------|
| <b>Acquisition Parameter</b> |            |                       |           |                  |           |
| Source Type                  | ESI        | Ion Polarity          | Positive  | Set Nebulizer    | 1.2 Bar   |
| Focus                        | Not active | Set Capillary         | 4500 V    | Set Dry Heater   | 200 °C    |
| Scan Begin                   | 50 m/z     | Set End Plate Offset  | -500 V    | Set Dry Gas      | 8.0 l/min |
| Scan End                     | 600 m/z    | Set Collision Cell RF | 180.0 Vpp | Set Divert Valve | Source    |

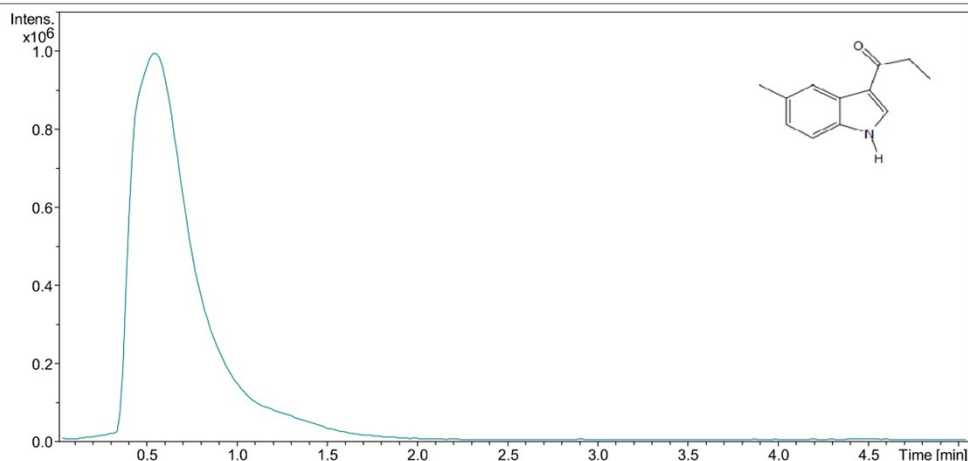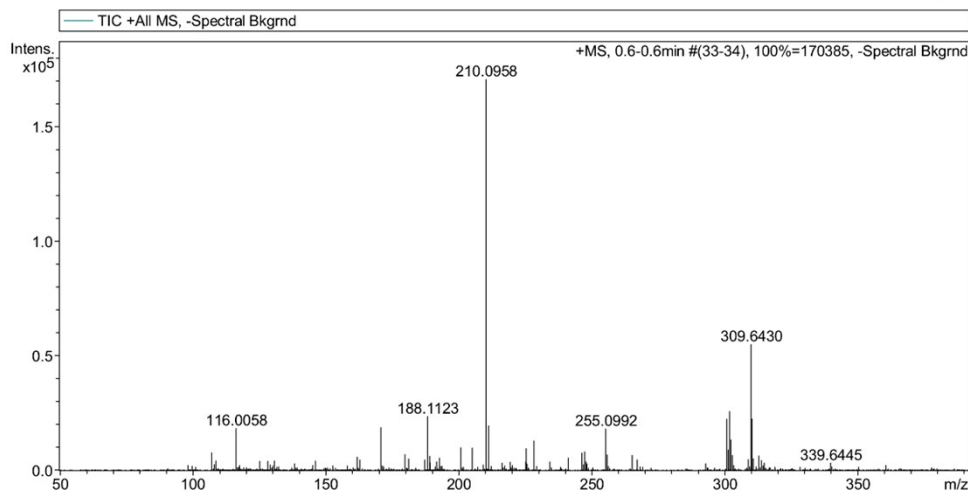

# $^1\text{H}$ NMR, $^{13}\text{C}$ NMR and HR-MS of 3-Isobutyryl-5-methylindole

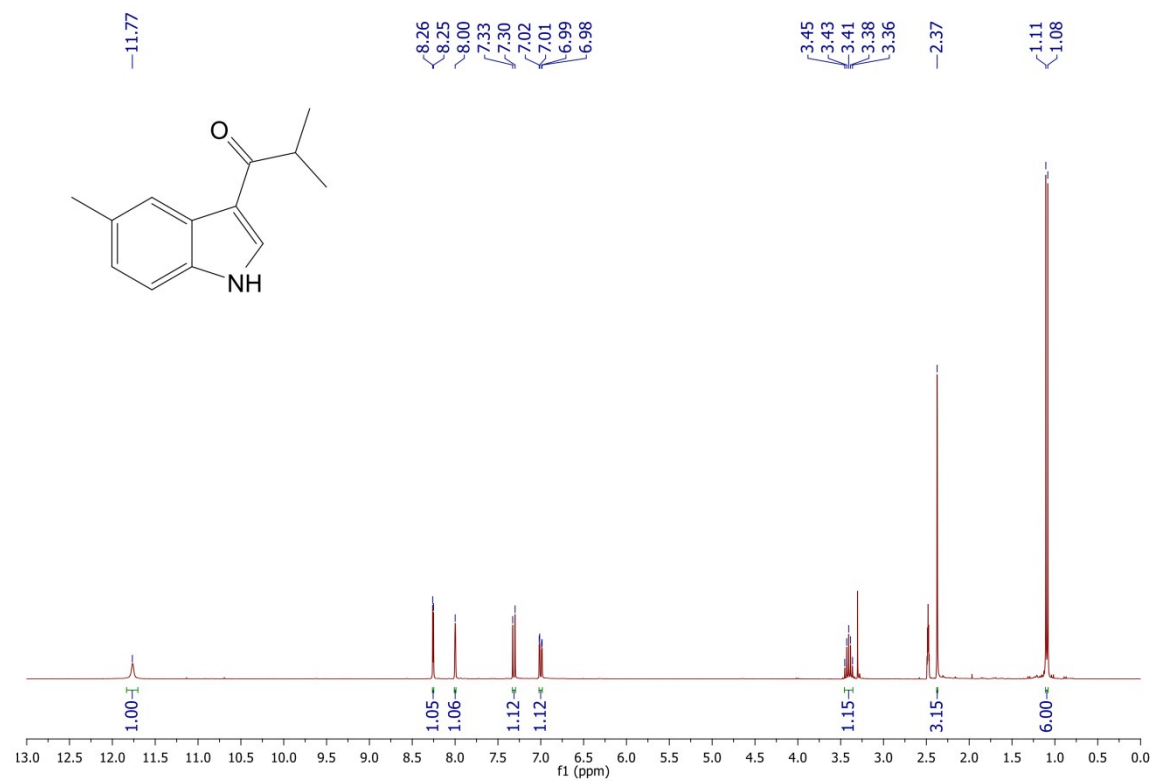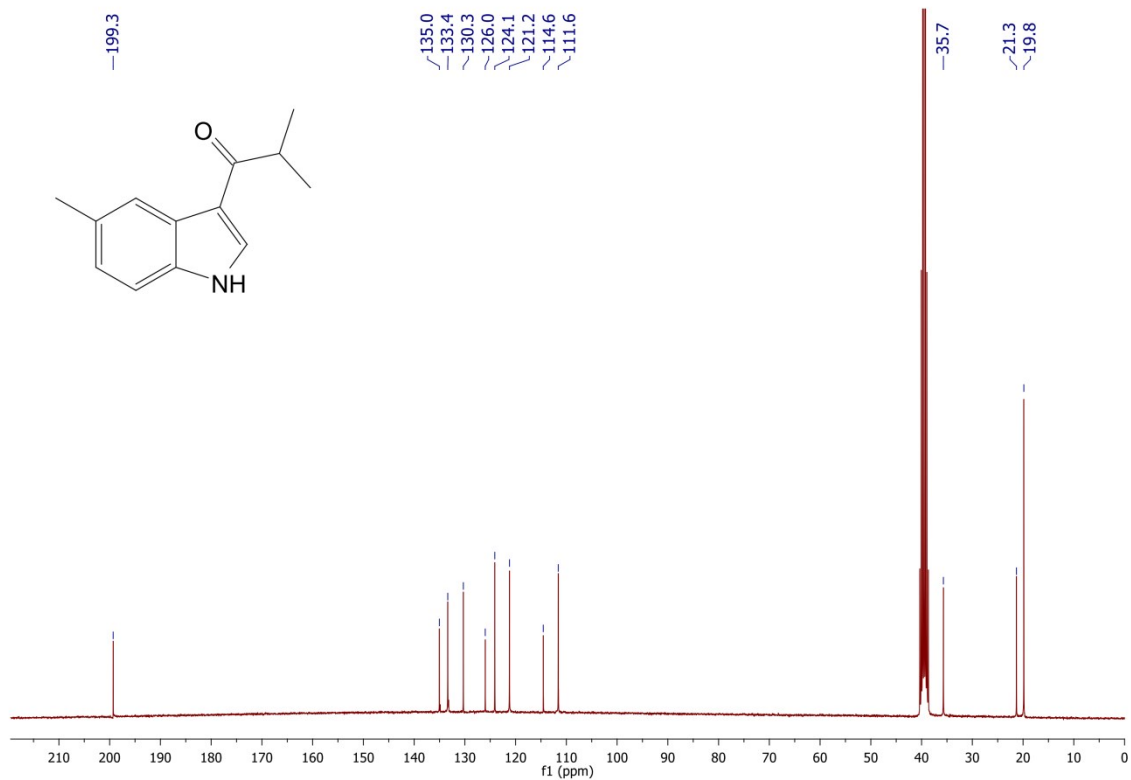

## Display Report

|                      |                                          |                  |                      |
|----------------------|------------------------------------------|------------------|----------------------|
| <b>Analysis Info</b> |                                          | Acquisition Date | 3/28/2015 3:13:39 PM |
| Analysis Name        | D:\Data\dmm 2015\ME-IBU_1-a,1_01_15128.d | Operator         | Mai                  |
| Method               | dmm.m                                    | Instrument       | micrOTOF-Q 10187     |
| Sample Name          | ME-IBU                                   |                  |                      |
| Comment              |                                          |                  |                      |

|                              |            |                       |           |                  |           |
|------------------------------|------------|-----------------------|-----------|------------------|-----------|
| <b>Acquisition Parameter</b> |            |                       |           |                  |           |
| Source Type                  | ESI        | Ion Polarity          | Positive  | Set Nebulizer    | 1.2 Bar   |
| Focus                        | Not active | Set Capillary         | 4500 V    | Set Dry Heater   | 200 °C    |
| Scan Begin                   | 50 m/z     | Set End Plate Offset  | -500 V    | Set Dry Gas      | 8.0 l/min |
| Scan End                     | 600 m/z    | Set Collision Cell RF | 180.0 Vpp | Set Divert Valve | Source    |

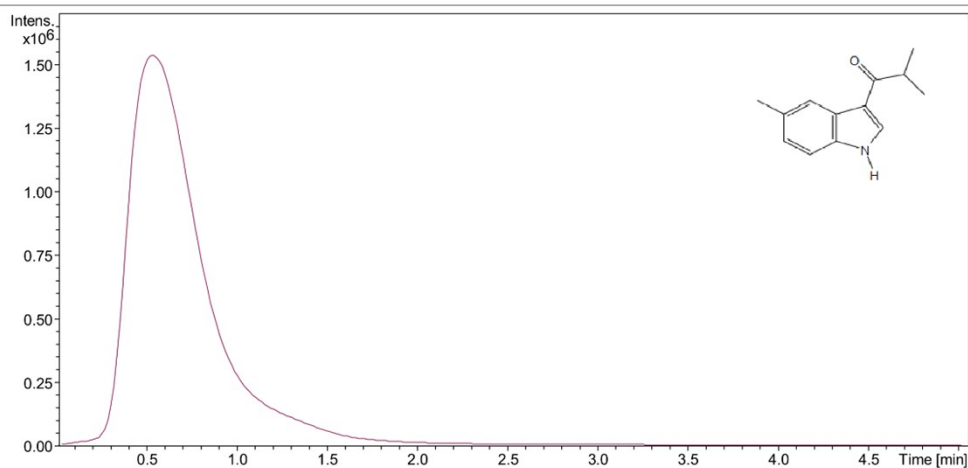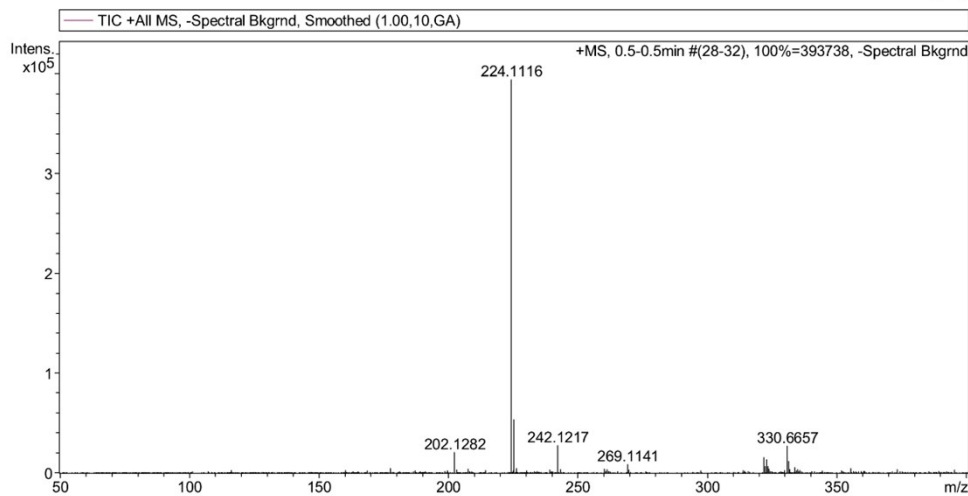

# <sup>1</sup>H NMR, <sup>13</sup>C NMR of 3-Acetyl-5-methoxyindole

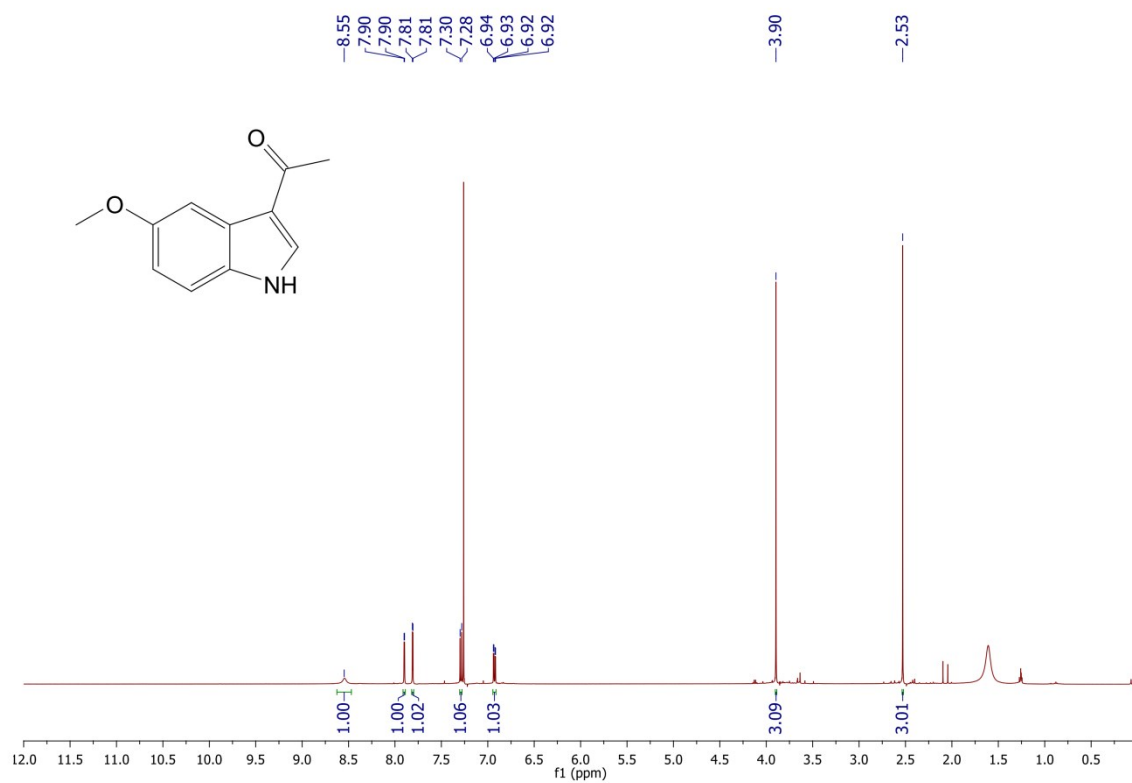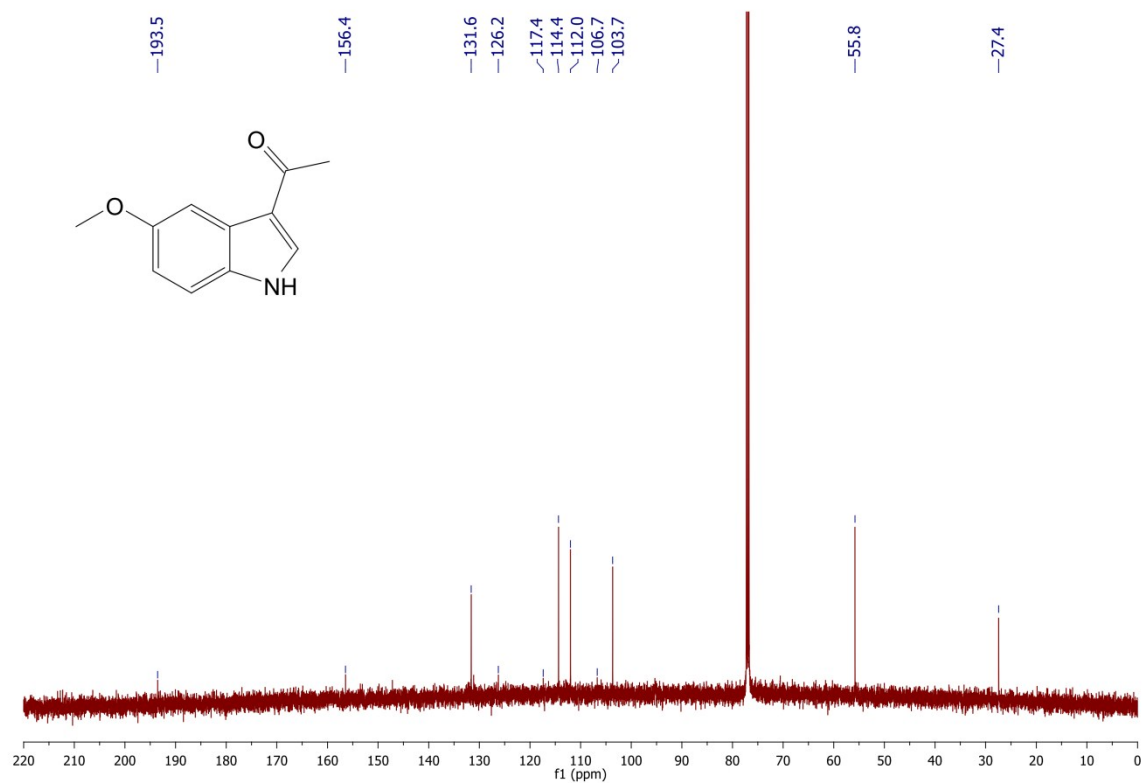

# <sup>1</sup>H NMR, <sup>13</sup>C NMR and HR-MS of 3-Isobutyryl-5-methoxyindole

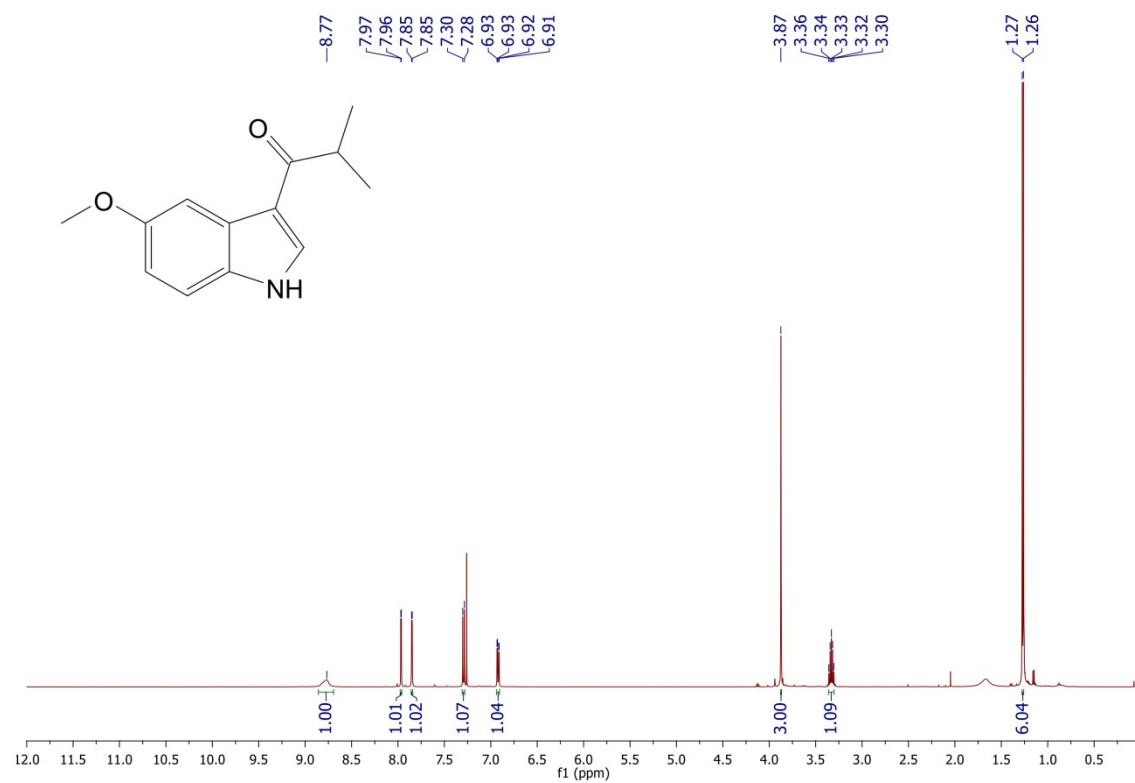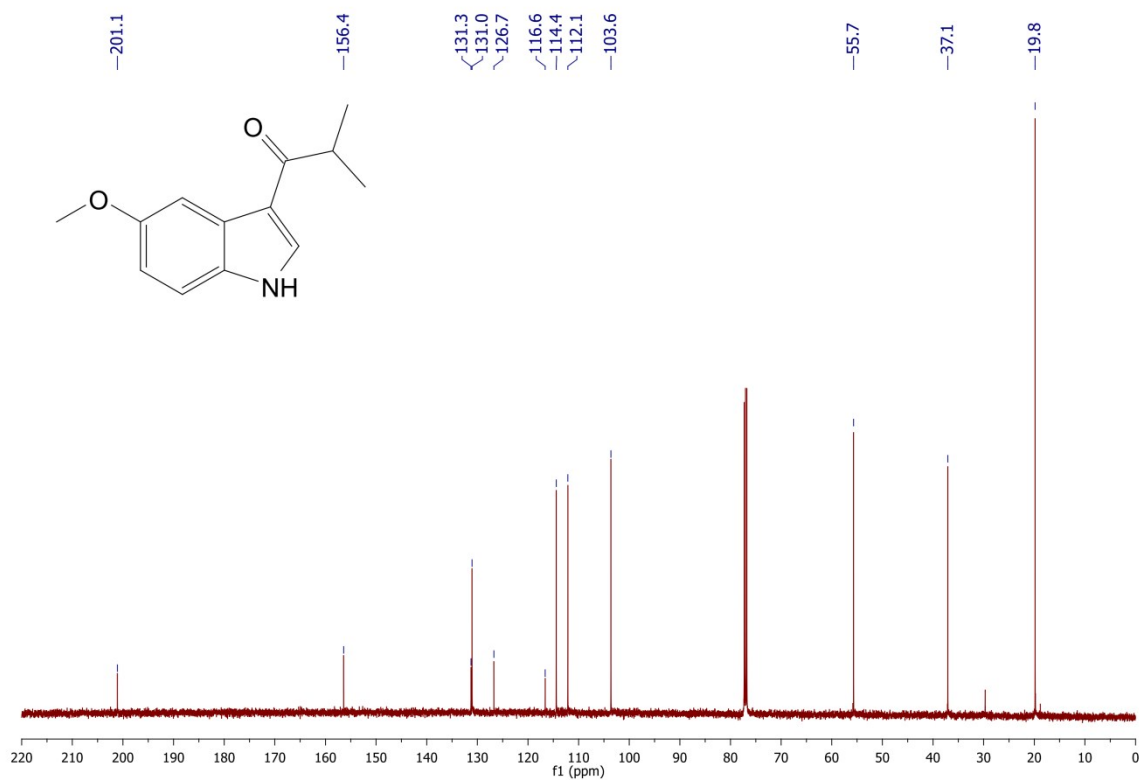



## Display Report

|                      |                                           |                  |                      |
|----------------------|-------------------------------------------|------------------|----------------------|
| <b>Analysis Info</b> |                                           | Acquisition Date | 3/28/2015 4:34:41 PM |
| Analysis Name        | D:\Data\dmm 2015\OME-IBU_1-a,1_01_15136.d | Operator         | Mai                  |
| Method               | dmm.m                                     | Instrument       | micrOTOF-Q 10187     |
| Sample Name          | OME-IBU                                   |                  |                      |
| Comment              |                                           |                  |                      |

|                              |            |                       |           |                  |           |
|------------------------------|------------|-----------------------|-----------|------------------|-----------|
| <b>Acquisition Parameter</b> |            |                       |           |                  |           |
| Source Type                  | ESI        | Ion Polarity          | Positive  | Set Nebulizer    | 1.2 Bar   |
| Focus                        | Not active | Set Capillary         | 4500 V    | Set Dry Heater   | 200 °C    |
| Scan Begin                   | 50 m/z     | Set End Plate Offset  | -500 V    | Set Dry Gas      | 8.0 l/min |
| Scan End                     | 600 m/z    | Set Collision Cell RF | 180.0 Vpp | Set Divert Valve | Source    |

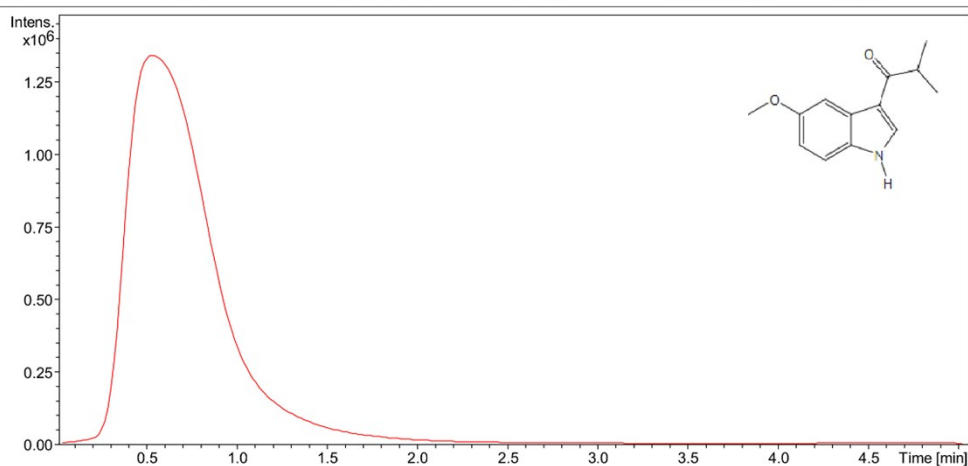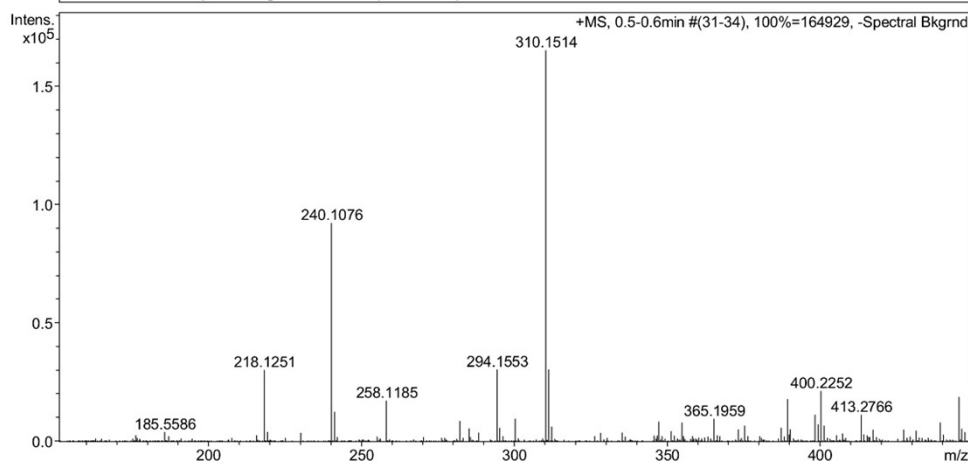

# <sup>1</sup>H NMR, <sup>13</sup>C NMR of 3-Acetyl-5-fluoroindole

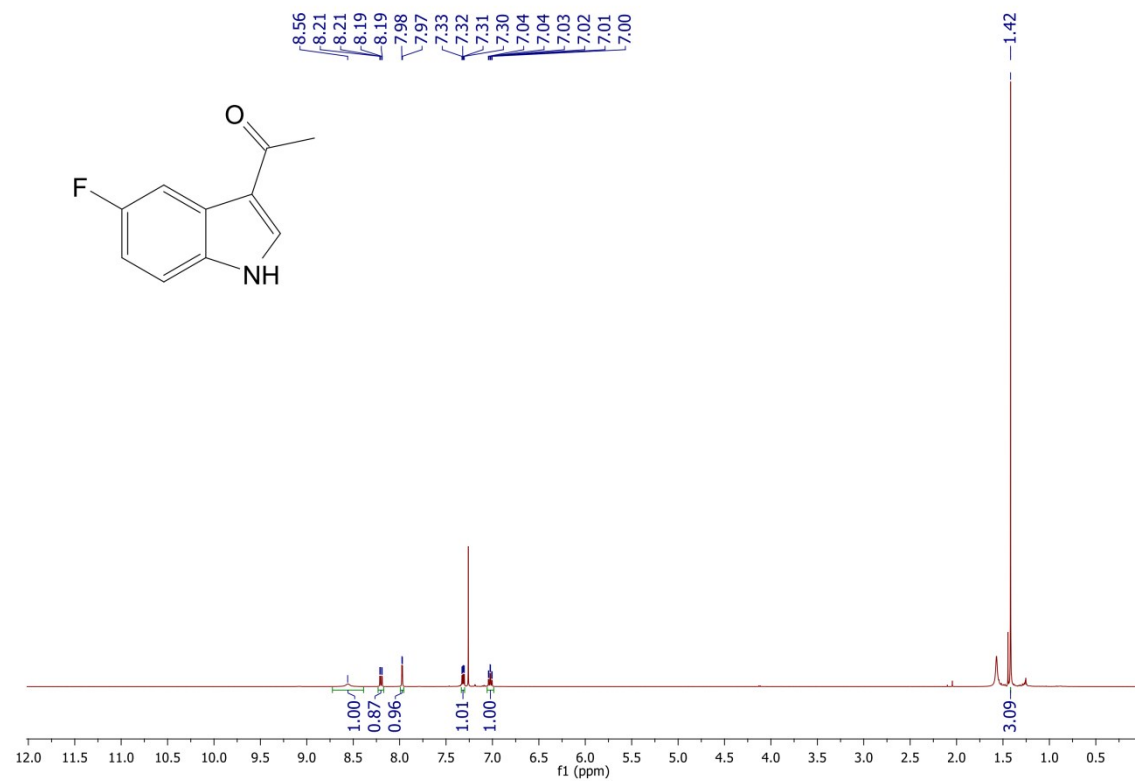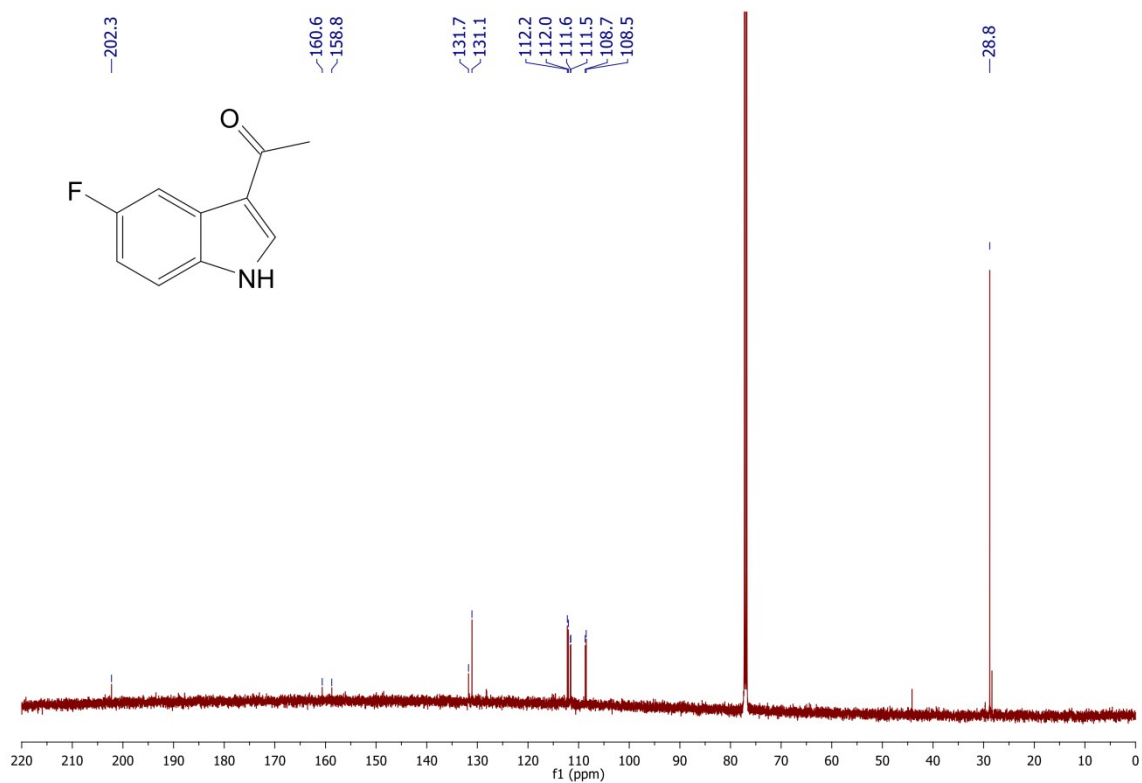

# $^1\text{H}$ NMR, $^{13}\text{C}$ NMR of 3-Propionyl-5-fluoroindole

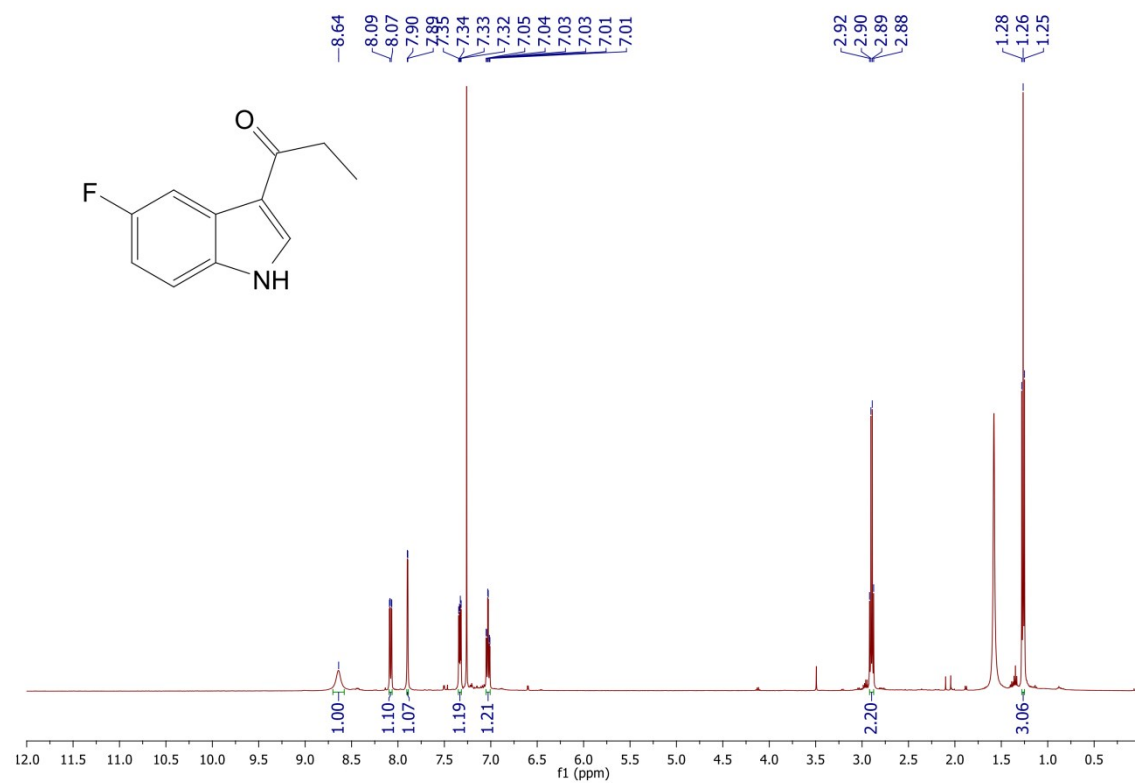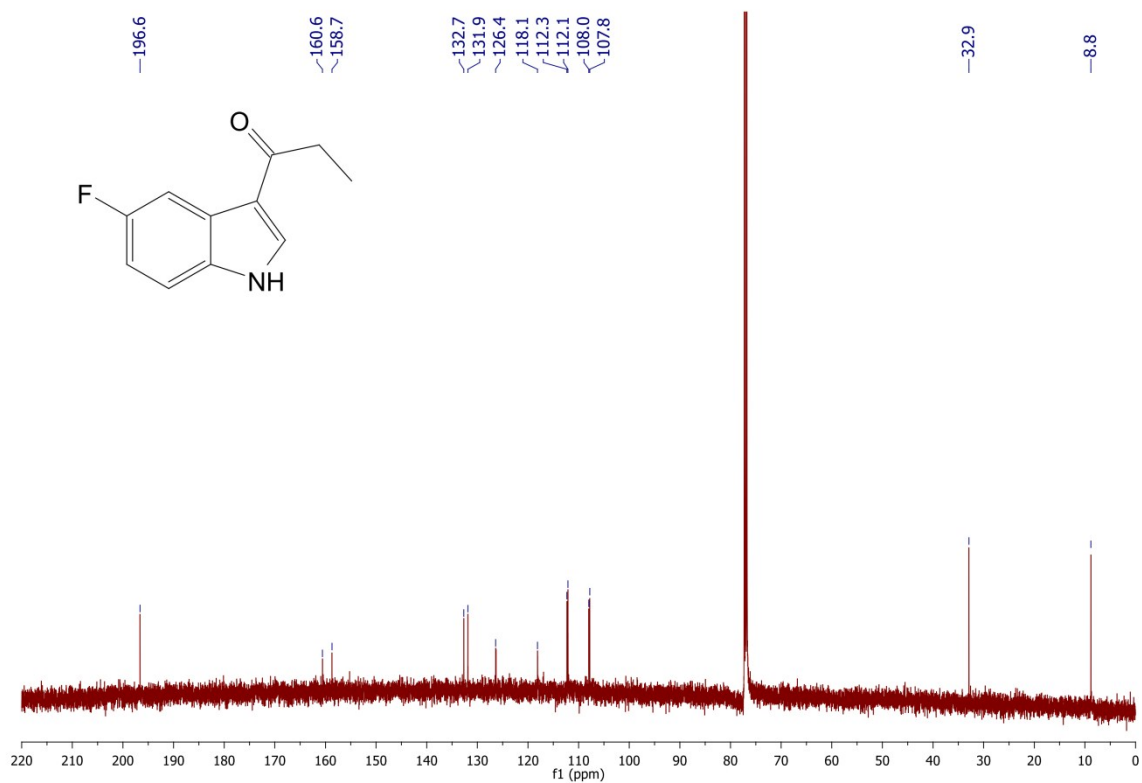

# $^1\text{H}$ NMR, $^{13}\text{C}$ NMR of 3-Acetyl-5-chloroindole

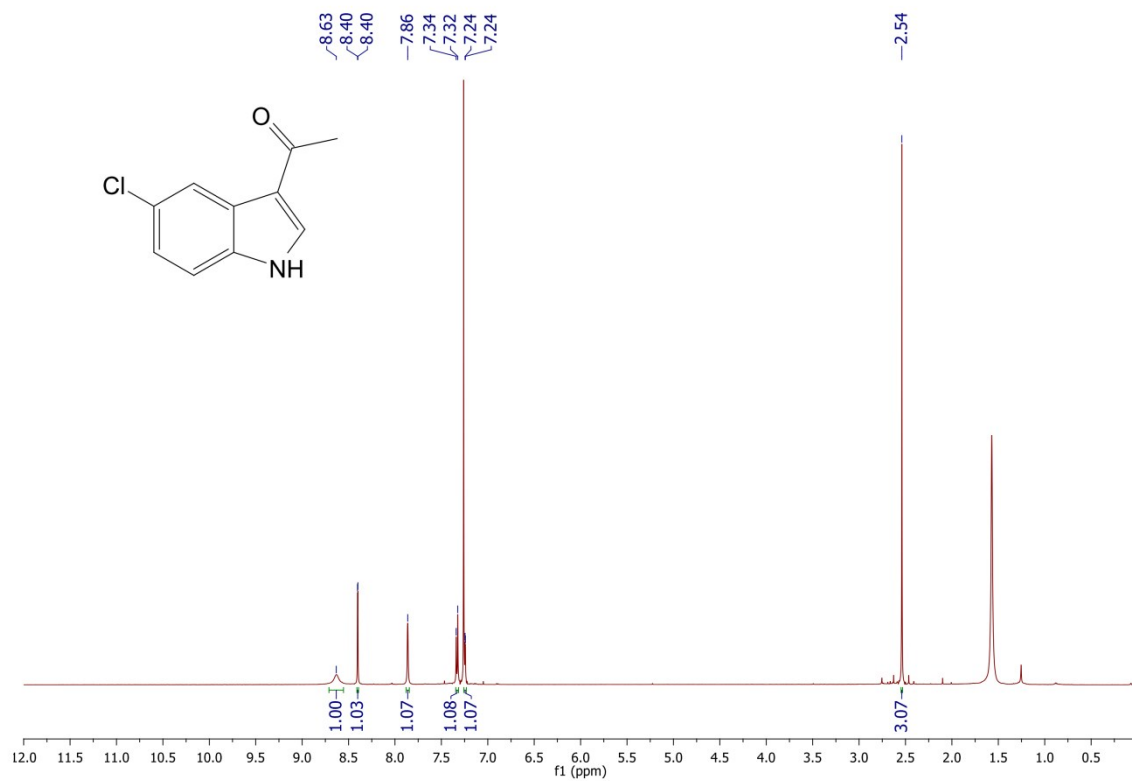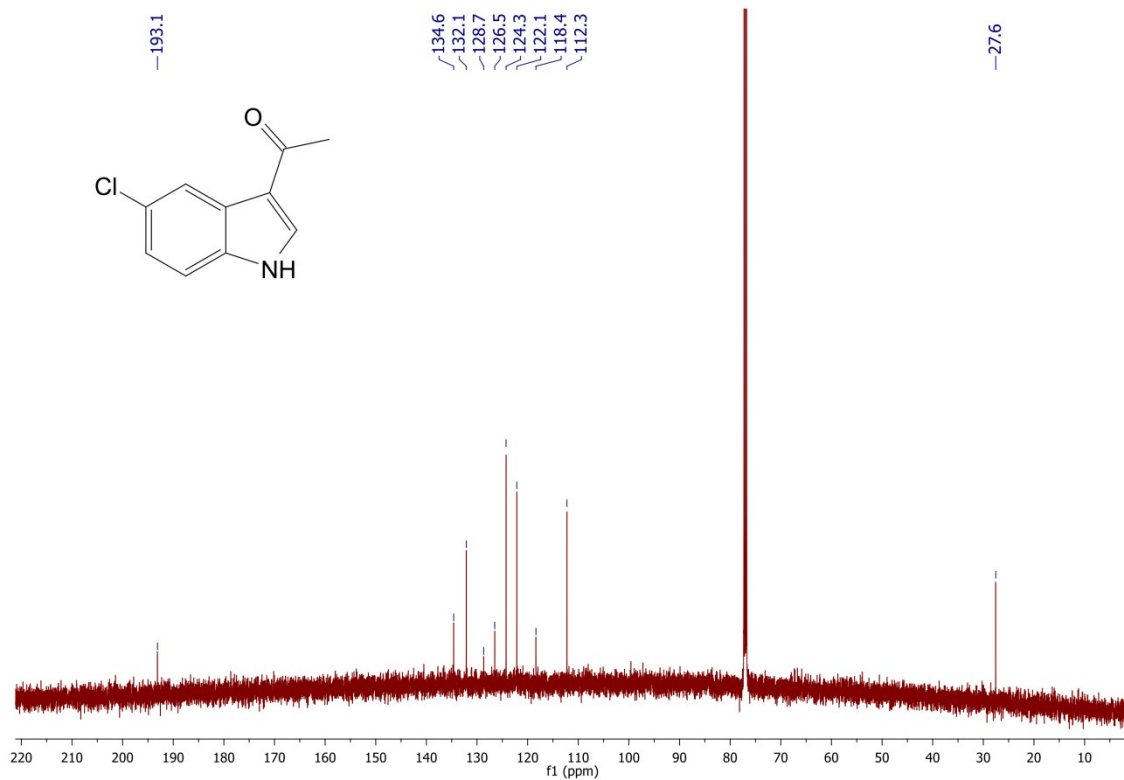

# $^1\text{H}$ NMR, $^{13}\text{C}$ NMR of 3-Propionyl-5-chloroindole

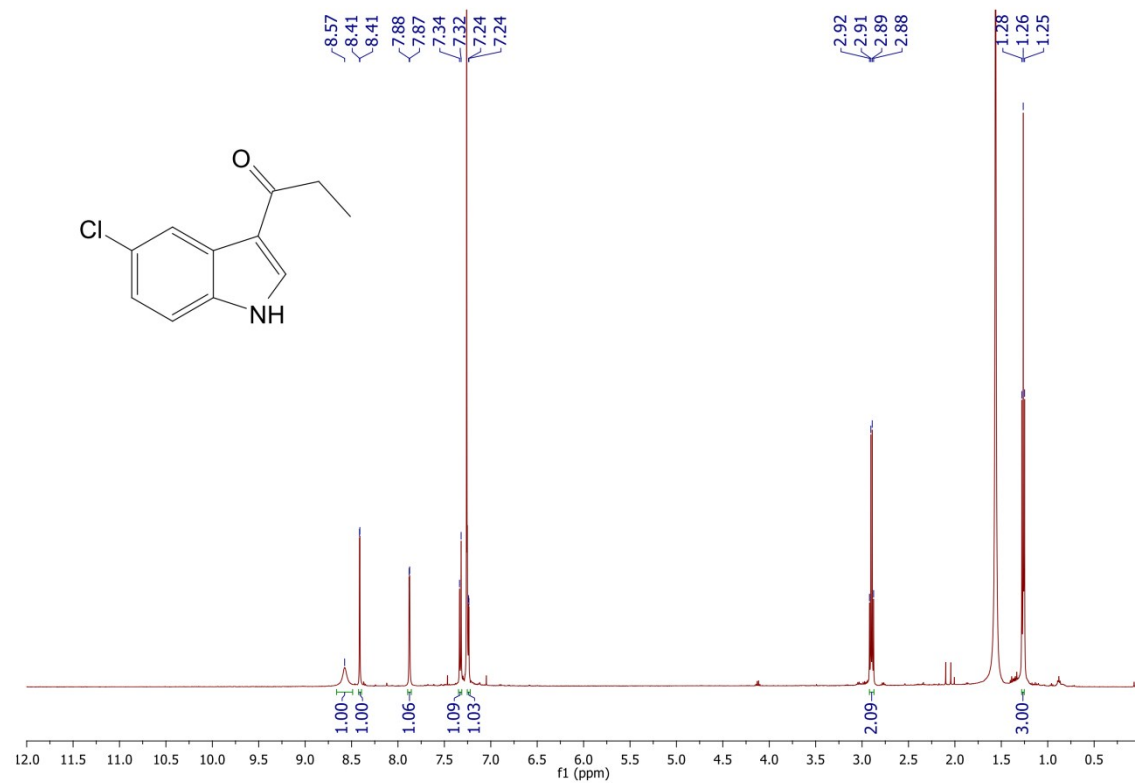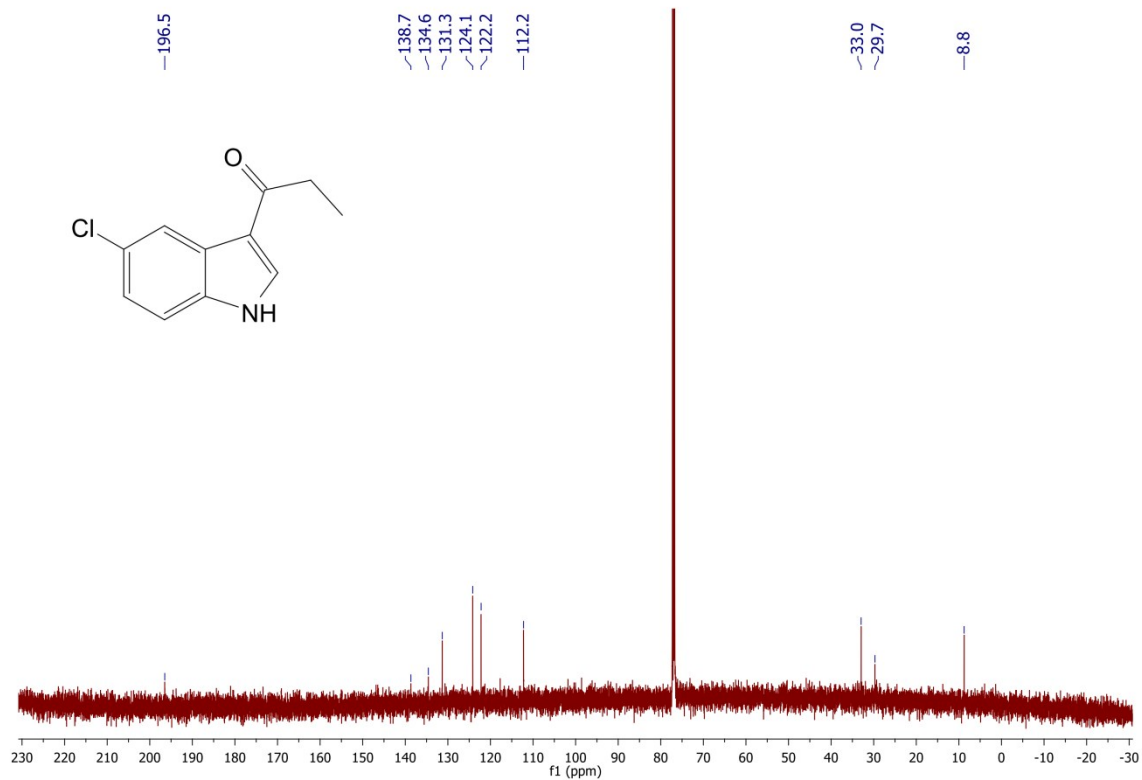

# <sup>1</sup>H NMR, <sup>13</sup>C NMR of 3-Butyryl-5-chloroindole

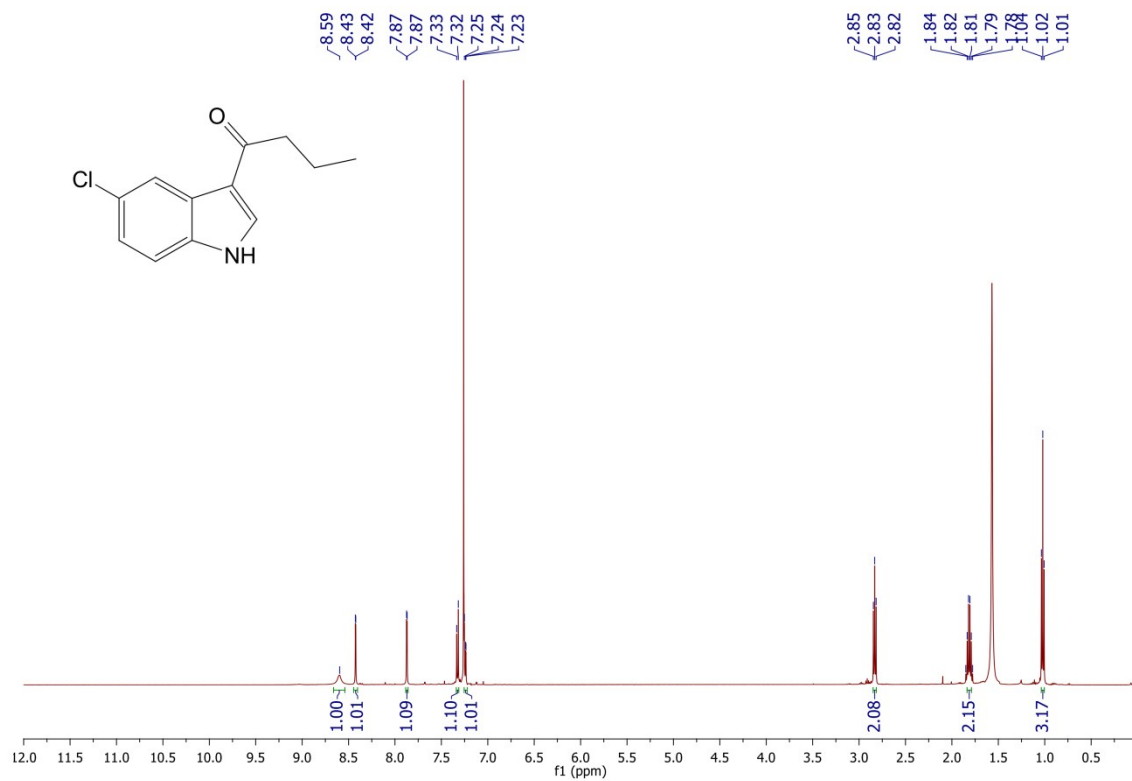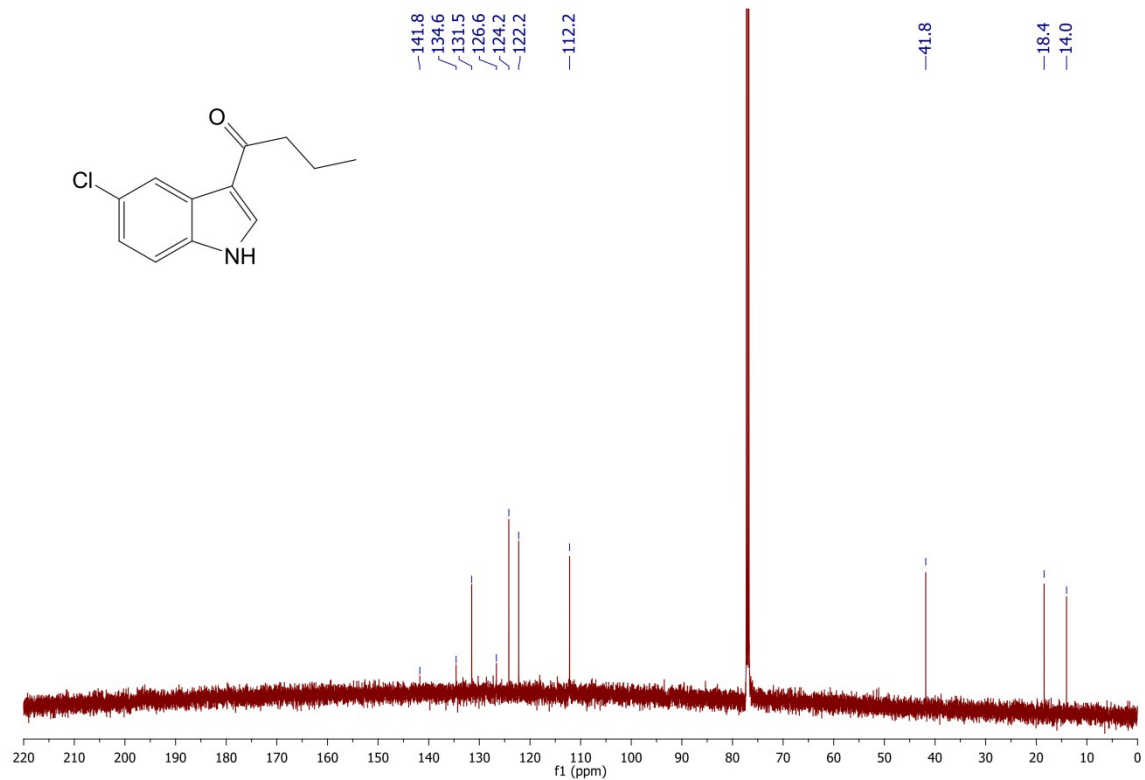

## Display Report

|                      |                                         |                  |                      |
|----------------------|-----------------------------------------|------------------|----------------------|
| <b>Analysis Info</b> |                                         | Acquisition Date | 3/28/2015 4:43:16 PM |
| Analysis Name        | D:\Data\dmm 2015\CL-BU_1-a,1_01_15137.d | Operator         | Mai                  |
| Method               | dmm.m                                   | Instrument       | micrOTOF-Q 10187     |
| Sample Name          | CL-BU                                   |                  |                      |
| Comment              |                                         |                  |                      |

### Acquisition Parameter

|             |            |                       |           |                  |           |
|-------------|------------|-----------------------|-----------|------------------|-----------|
| Source Type | ESI        | Ion Polarity          | Positive  | Set Nebulizer    | 1.2 Bar   |
| Focus       | Not active | Set Capillary         | 4500 V    | Set Dry Heater   | 200 °C    |
| Scan Begin  | 50 m/z     | Set End Plate Offset  | -500 V    | Set Dry Gas      | 8.0 l/min |
| Scan End    | 600 m/z    | Set Collision Cell RF | 180.0 Vpp | Set Divert Valve | Source    |

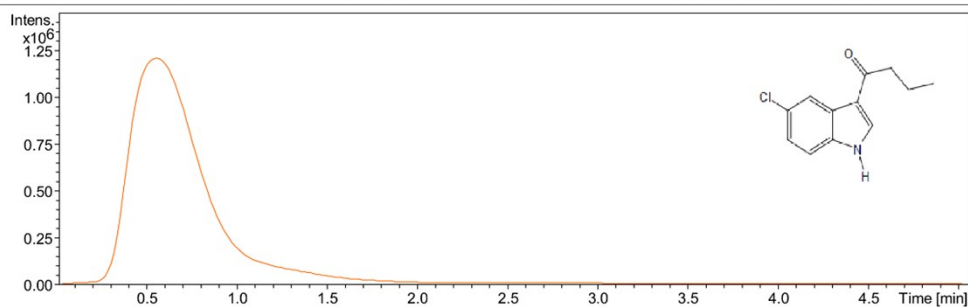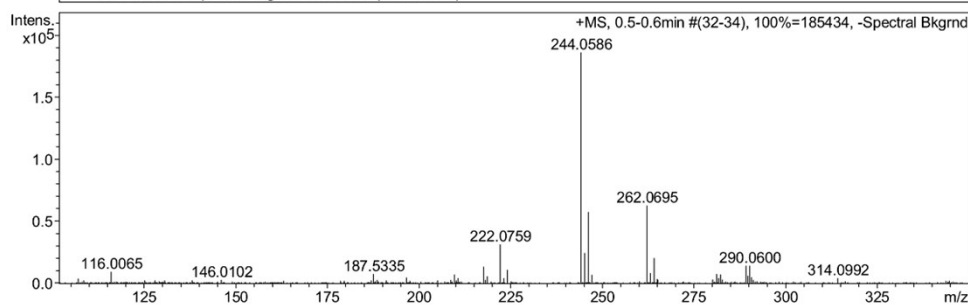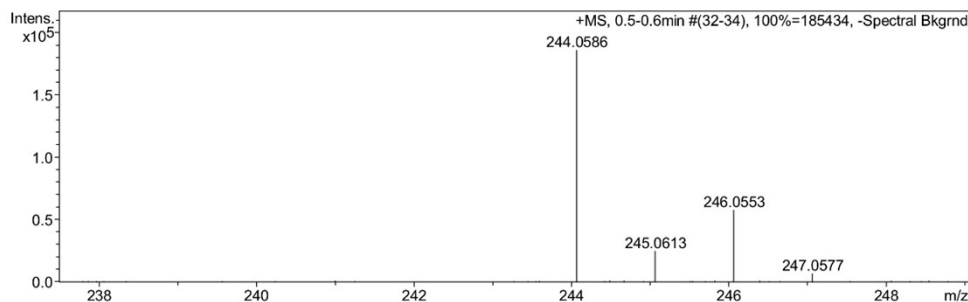

# <sup>1</sup>H NMR, <sup>13</sup>C NMR and HR-MS of 3-Isobutyryl-5-chloroindole

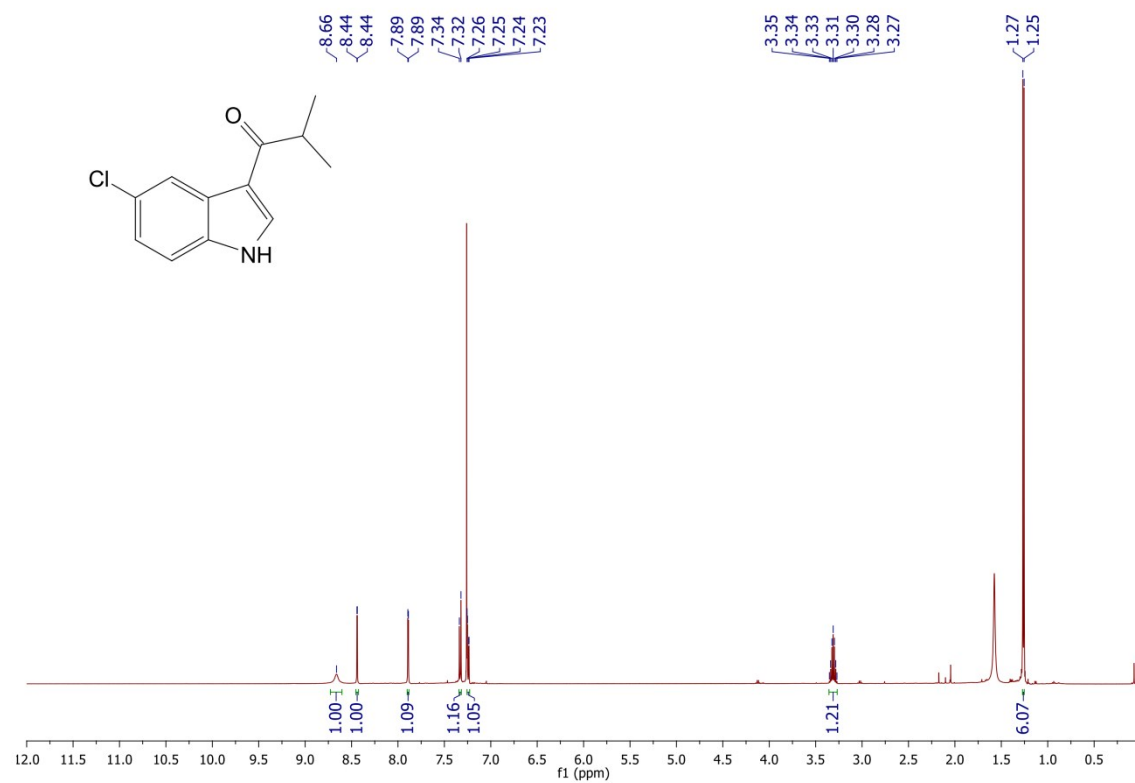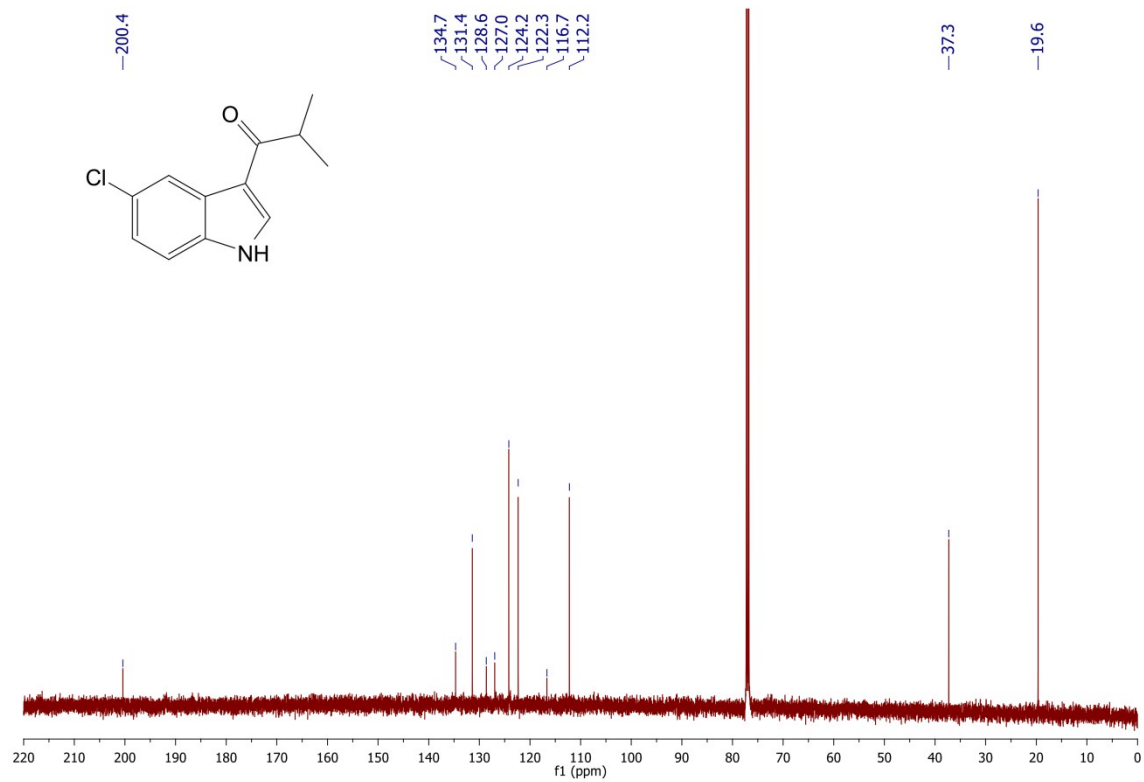



## Display Report

|                      |                                          |                  |                      |
|----------------------|------------------------------------------|------------------|----------------------|
| <b>Analysis Info</b> |                                          | Acquisition Date | 3/28/2015 5:19:10 PM |
| Analysis Name        | D:\Data\dmm 2015\CL-IBU_1-a,1_01_15141.d | Operator         | Mai                  |
| Method               | dmm.m                                    | Instrument       | micrOTOF-Q 10187     |
| Sample Name          | CL-IBU                                   |                  |                      |
| Comment              |                                          |                  |                      |

|                              |            |                       |           |                  |           |
|------------------------------|------------|-----------------------|-----------|------------------|-----------|
| <b>Acquisition Parameter</b> |            |                       |           |                  |           |
| Source Type                  | ESI        | Ion Polarity          | Positive  | Set Nebulizer    | 1.2 Bar   |
| Focus                        | Not active | Set Capillary         | 4500 V    | Set Dry Heater   | 200 °C    |
| Scan Begin                   | 50 m/z     | Set End Plate Offset  | -500 V    | Set Dry Gas      | 8.0 l/min |
| Scan End                     | 600 m/z    | Set Collision Cell RF | 180.0 Vpp | Set Divert Valve | Source    |

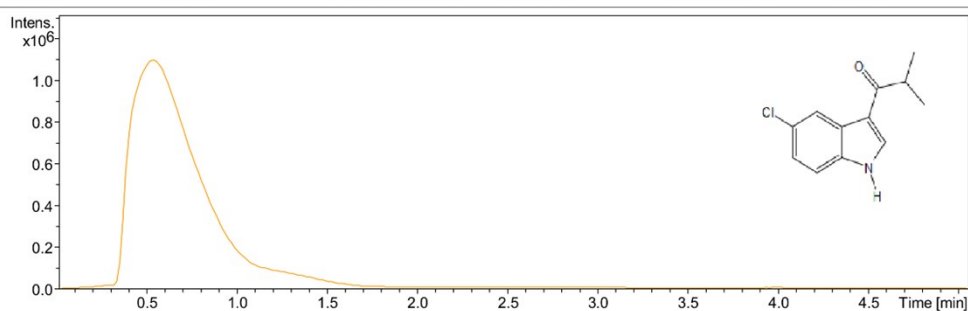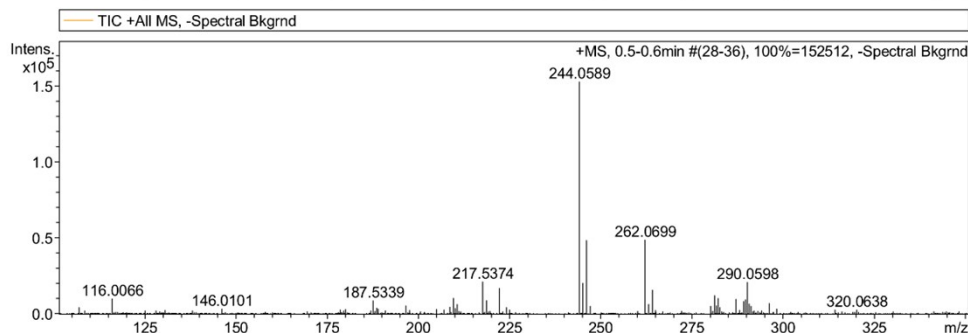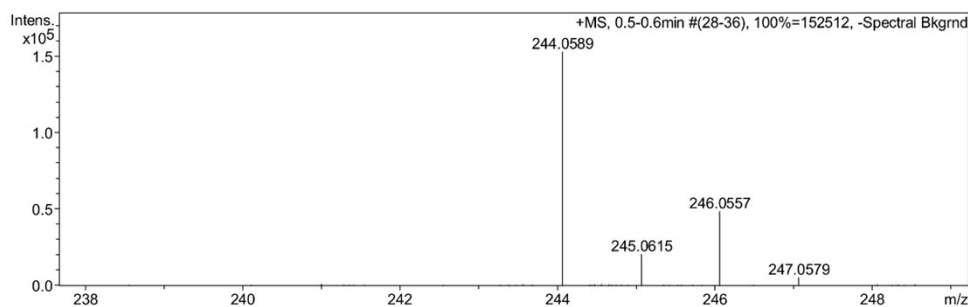

# $^1\text{H}$ NMR, $^{13}\text{C}$ NMR of 3-Pivaloyl-5-chloroindole

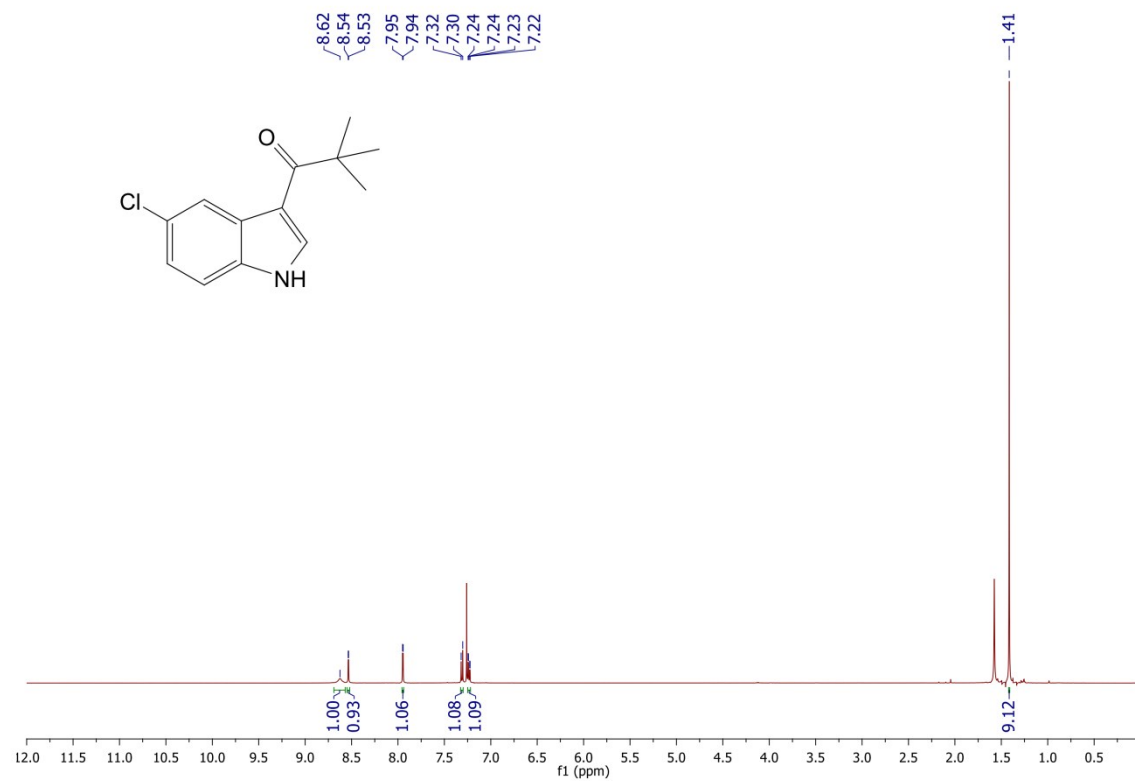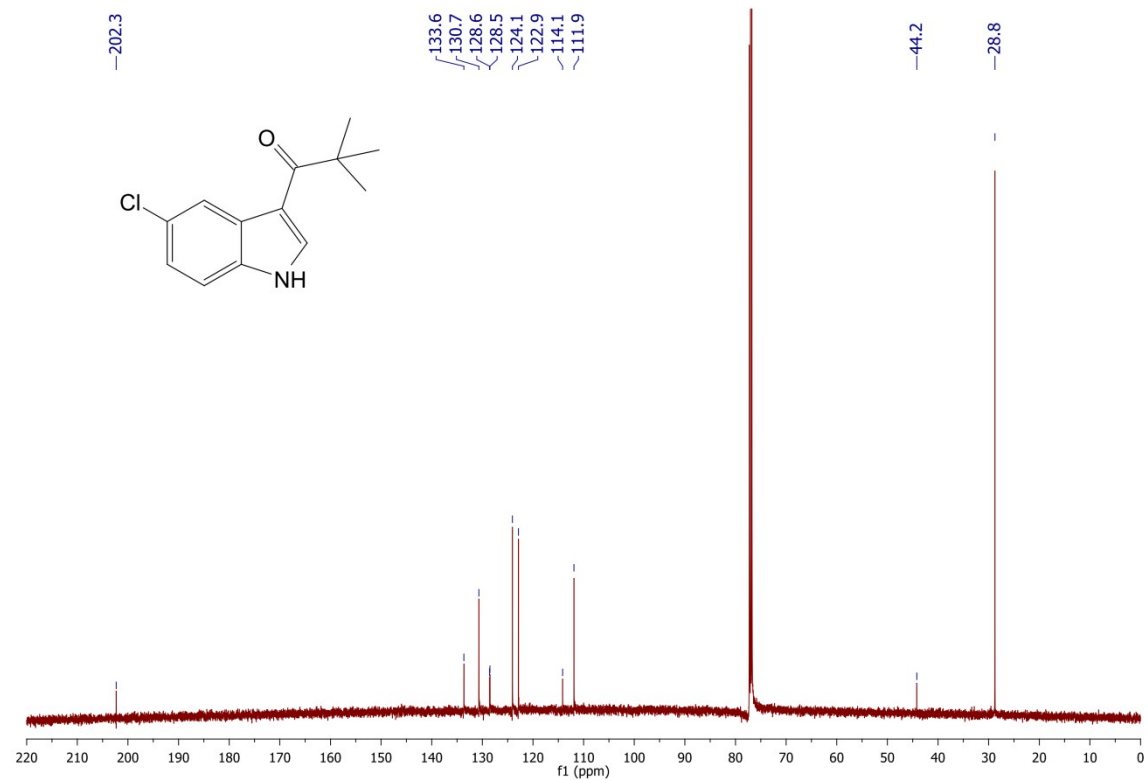

# $^1\text{H}$ NMR, $^{13}\text{C}$ NMR of 3-Benzoyl-5-chloroindole

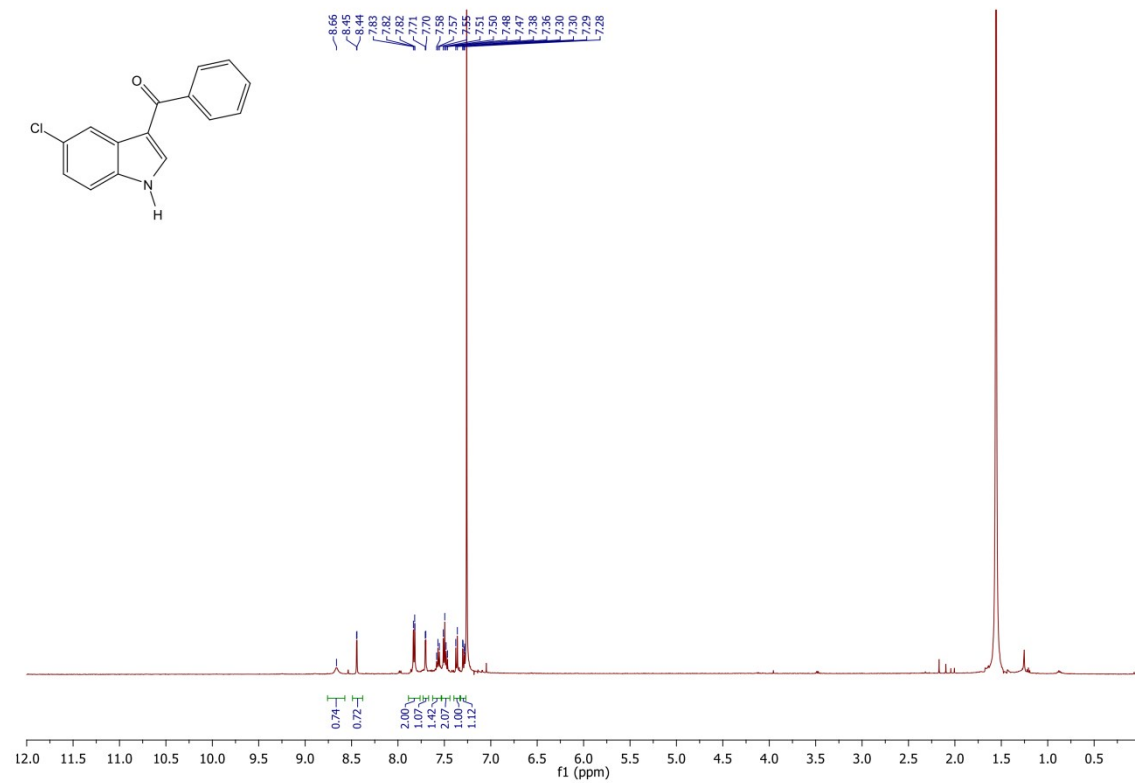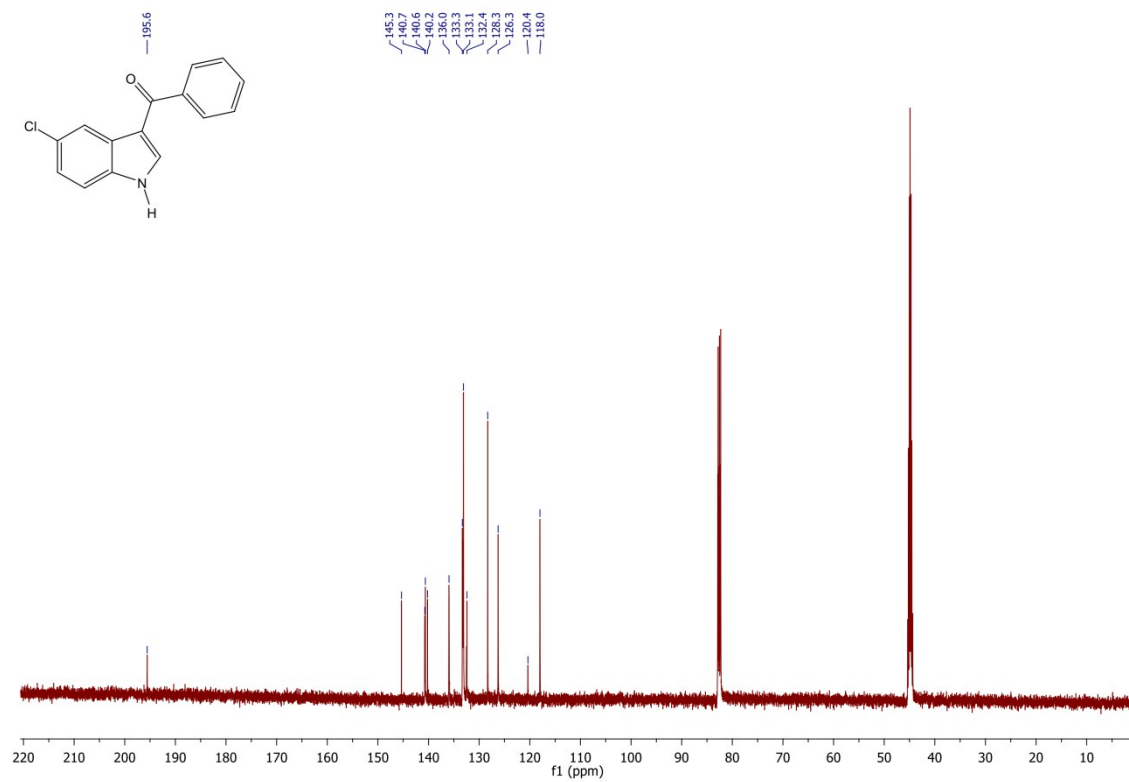

# <sup>1</sup>H NMR, <sup>13</sup>C NMR of 3-Propionyl-5-bromoindole

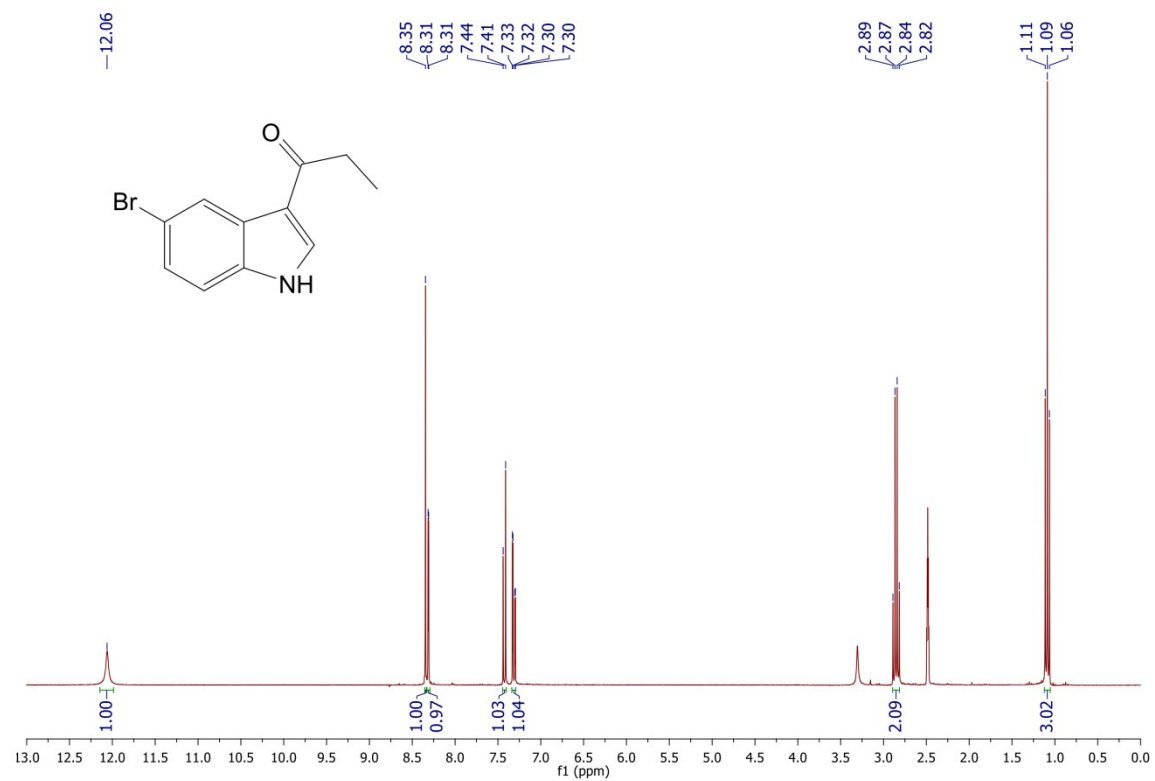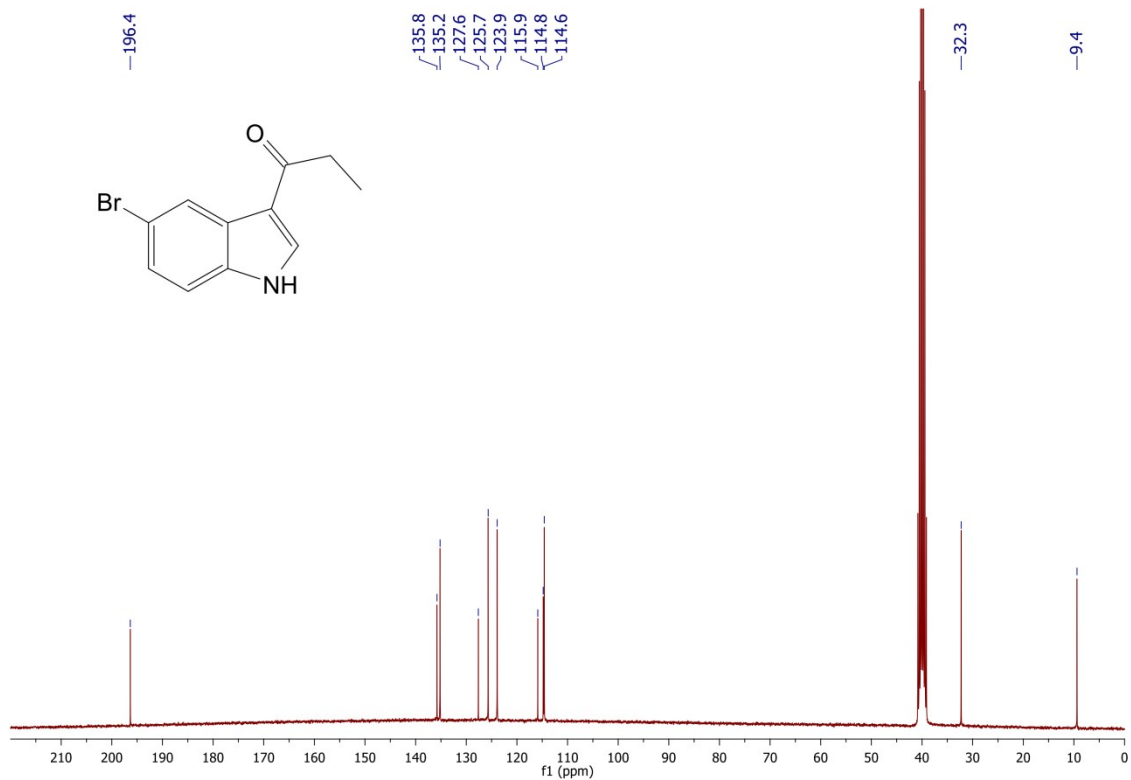

# <sup>1</sup>H NMR, <sup>13</sup>C NMR and HR-MS of 3-Pivaloyl-5-bromoindole

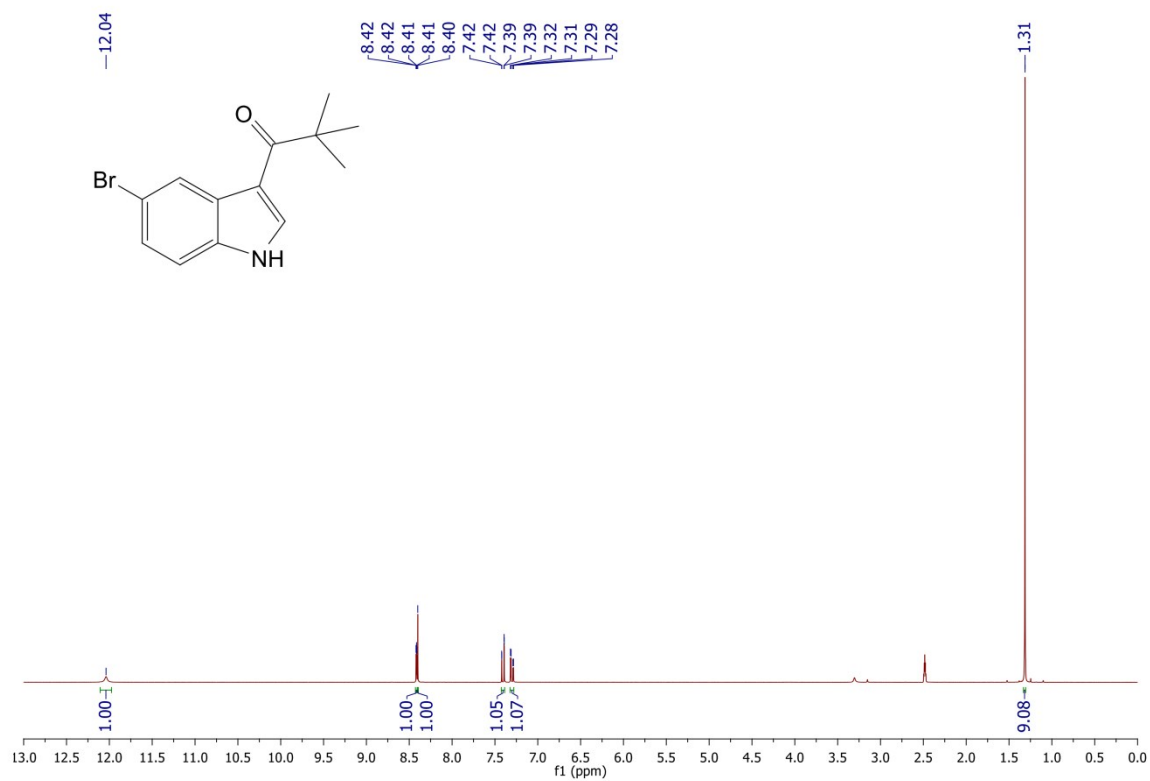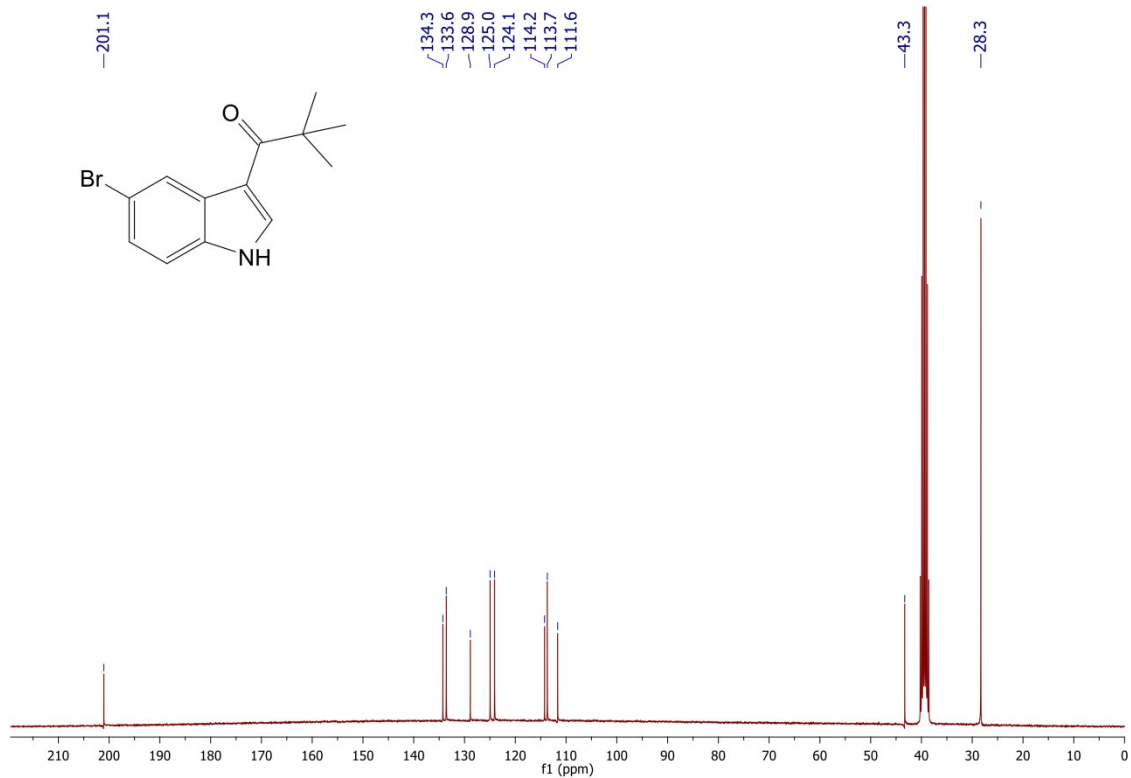

## Display Report

|                      |                                           |                      |                  |
|----------------------|-------------------------------------------|----------------------|------------------|
| <b>Analysis Info</b> | Acquisition Date                          | 3/28/2015 3:58:29 PM |                  |
| Analysis Name        | D:\Data\dmm 2015\5BR-TME_1-a,1_01_15133.d | Operator             | Mai              |
| Method               | dmm.m                                     | Instrument           | micrOTOF-Q 10187 |
| Sample Name          | 5BR-TME                                   |                      |                  |
| Comment              |                                           |                      |                  |

### Acquisition Parameter

|             |            |                       |           |                  |           |
|-------------|------------|-----------------------|-----------|------------------|-----------|
| Source Type | ESI        | Ion Polarity          | Positive  | Set Nebulizer    | 1.2 Bar   |
| Focus       | Not active | Set Capillary         | 4500 V    | Set Dry Heater   | 200 °C    |
| Scan Begin  | 50 m/z     | Set End Plate Offset  | -500 V    | Set Dry Gas      | 8.0 l/min |
| Scan End    | 600 m/z    | Set Collision Cell RF | 180.0 Vpp | Set Divert Valve | Source    |

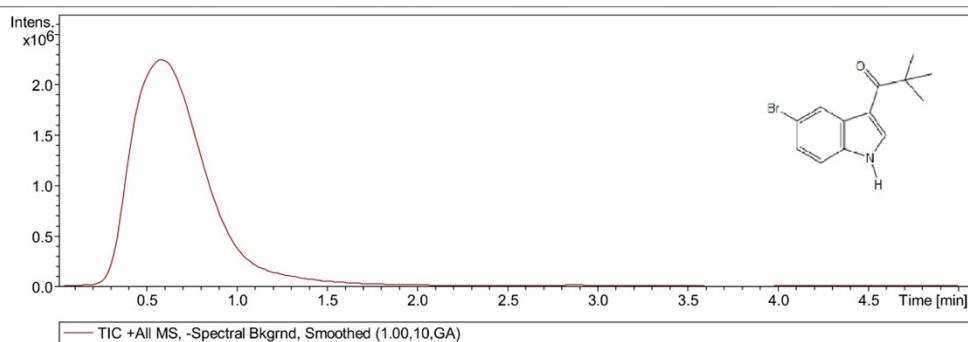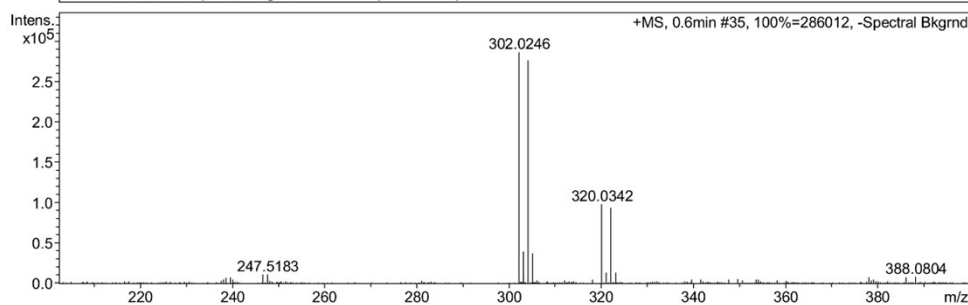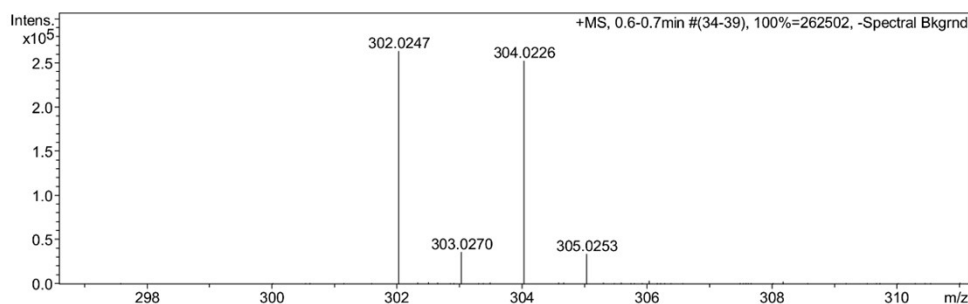

# <sup>1</sup>H NMR, <sup>13</sup>C NMR and HR-MS of 3-Propionyl-4-bromoindole

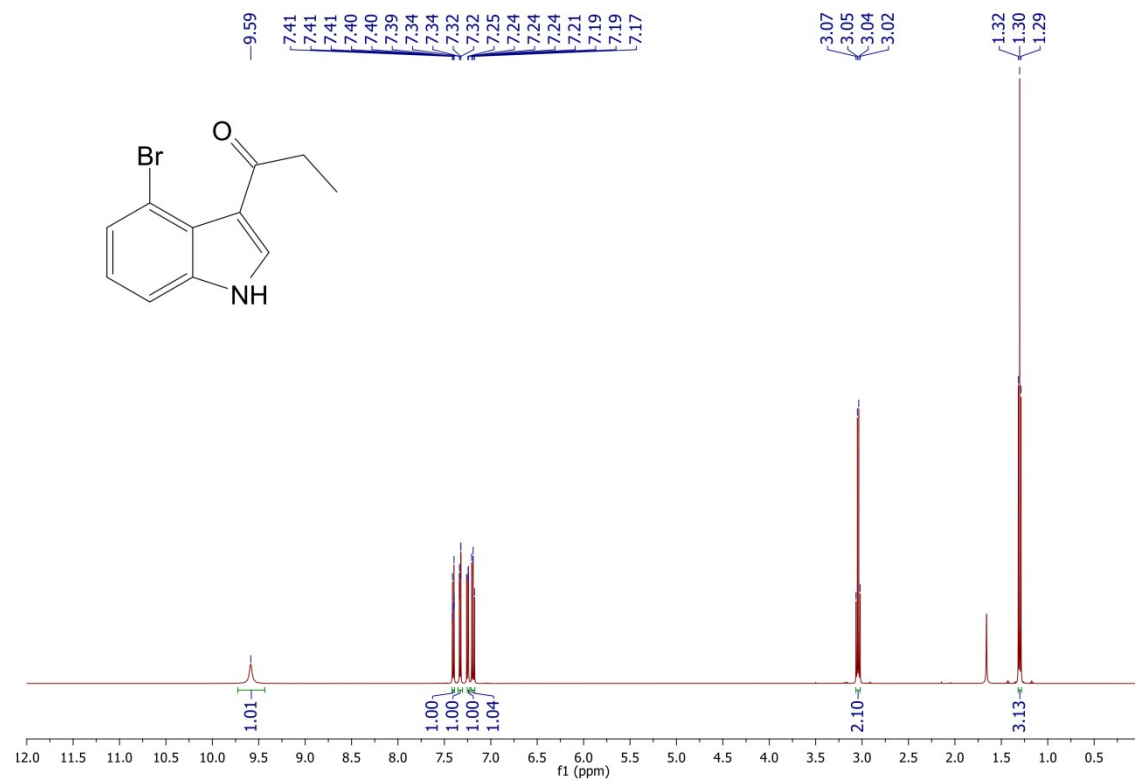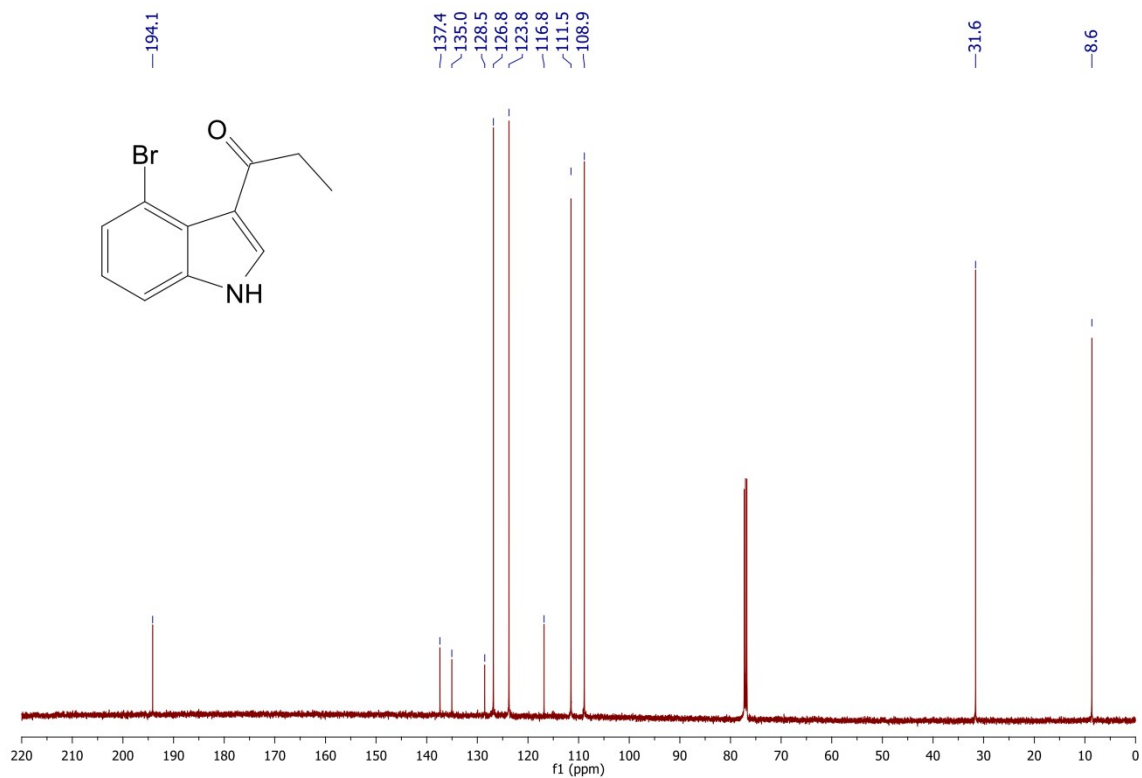

## Display Report

|                      |                                          |                  |                      |
|----------------------|------------------------------------------|------------------|----------------------|
| <b>Analysis Info</b> |                                          | Acquisition Date | 3/28/2015 5:06:33 PM |
| Analysis Name        | D:\Data\dmm 2015\4BR-PR_1-a,1_01_15139.d | Operator         | Mai                  |
| Method               | dmm.m                                    | Instrument       | micrOTOF-Q 10187     |
| Sample Name          | 4BR-PR                                   |                  |                      |
| Comment              |                                          |                  |                      |

### Acquisition Parameter

|             |            |                       |           |                  |           |
|-------------|------------|-----------------------|-----------|------------------|-----------|
| Source Type | ESI        | Ion Polarity          | Positive  | Set Nebulizer    | 1.2 Bar   |
| Focus       | Not active | Set Capillary         | 4500 V    | Set Dry Heater   | 200 °C    |
| Scan Begin  | 50 m/z     | Set End Plate Offset  | -500 V    | Set Dry Gas      | 8.0 l/min |
| Scan End    | 600 m/z    | Set Collision Cell RF | 180.0 Vpp | Set Divert Valve | Source    |

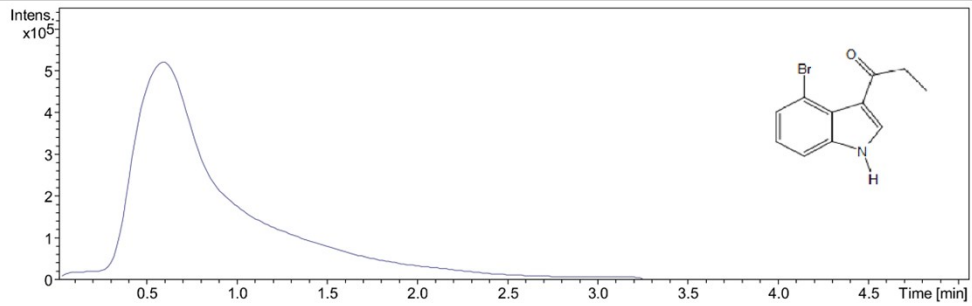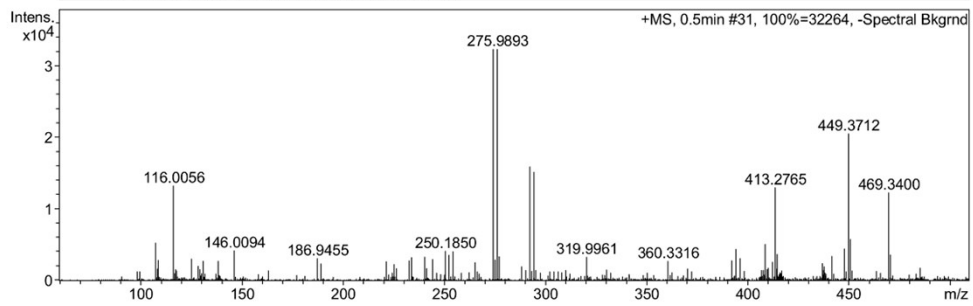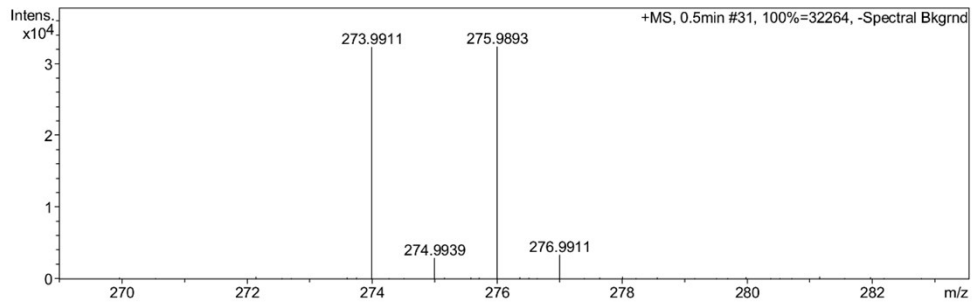



# $^1\text{H}$ NMR, $^{13}\text{C}$ NMR and HR-MS of 3-Pivaloyl-4-bromoindole

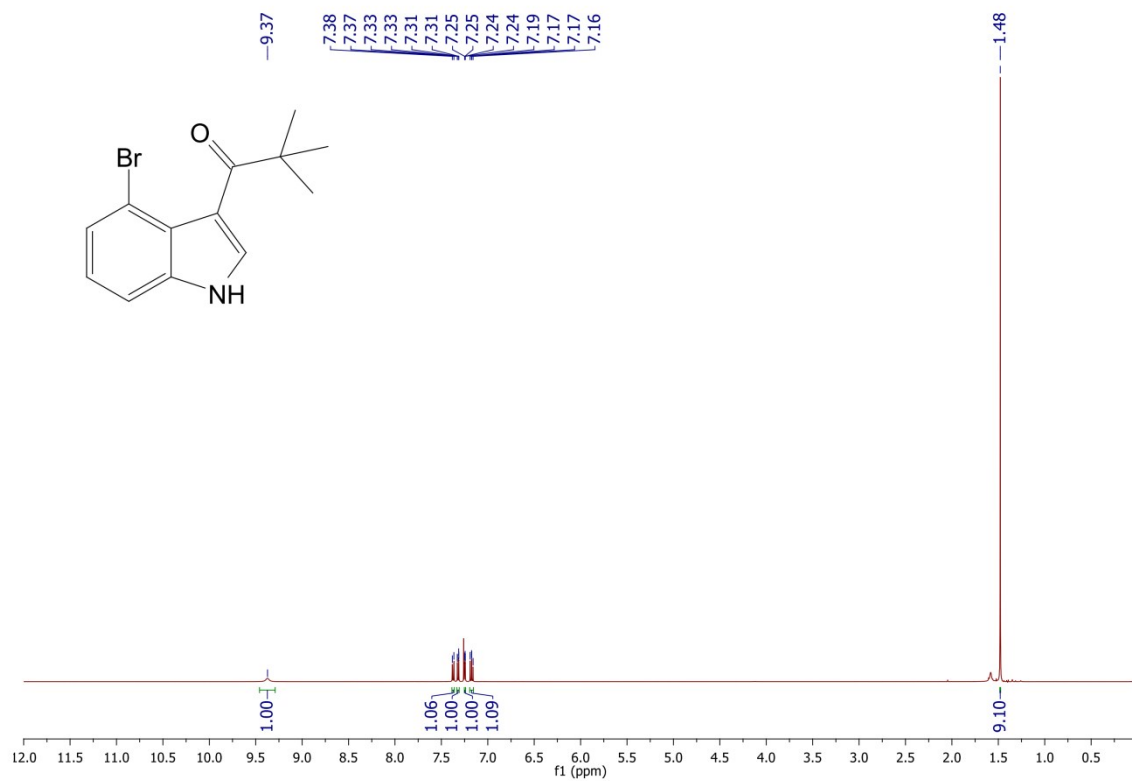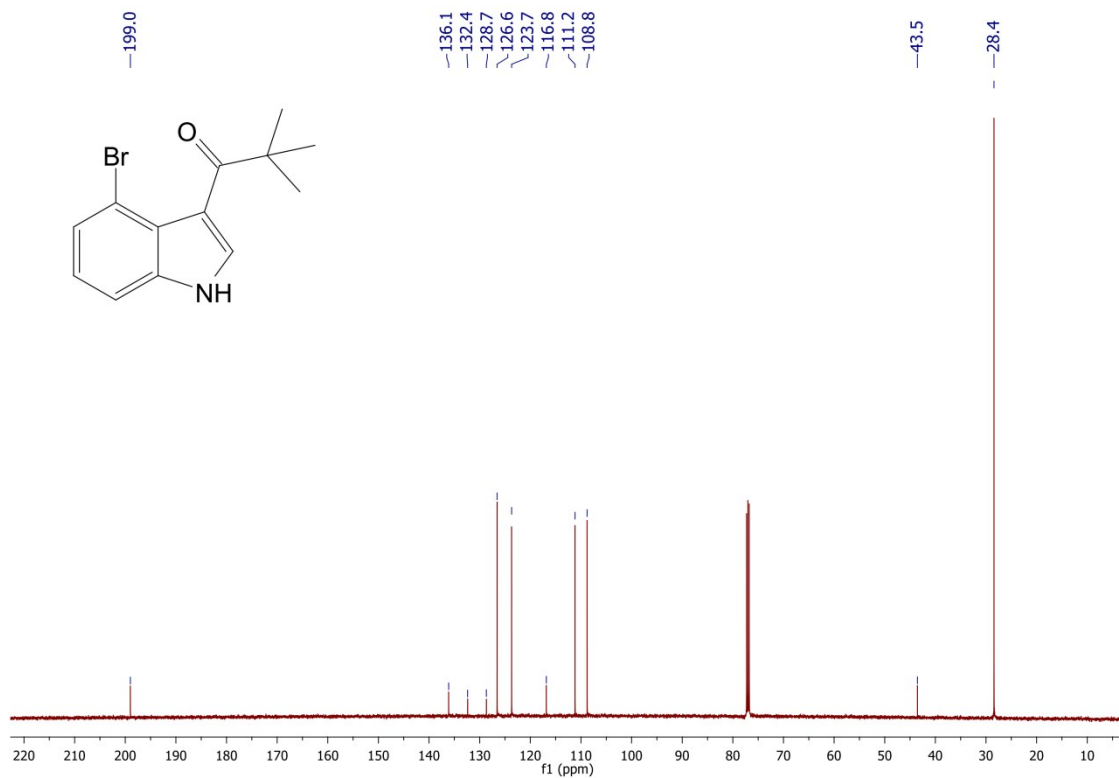

## Display Report

|                      |                                           |                  |                      |
|----------------------|-------------------------------------------|------------------|----------------------|
| <b>Analysis Info</b> |                                           | Acquisition Date | 3/28/2015 4:58:59 PM |
| Analysis Name        | D:\Data\dmm 2015\4BR-TME_1-a,1_01_15138.d | Operator         | Mai                  |
| Method               | dmm.m                                     | Instrument       | micrOTOF-Q 10187     |
| Sample Name          | 4BR-TME                                   |                  |                      |
| Comment              |                                           |                  |                      |

### Acquisition Parameter

|             |            |                       |           |                  |           |
|-------------|------------|-----------------------|-----------|------------------|-----------|
| Source Type | ESI        | Ion Polarity          | Positive  | Set Nebulizer    | 1.2 Bar   |
| Focus       | Not active | Set Capillary         | 4500 V    | Set Dry Heater   | 200 °C    |
| Scan Begin  | 50 m/z     | Set End Plate Offset  | -500 V    | Set Dry Gas      | 8.0 l/min |
| Scan End    | 600 m/z    | Set Collision Cell RF | 180.0 Vpp | Set Divert Valve | Source    |

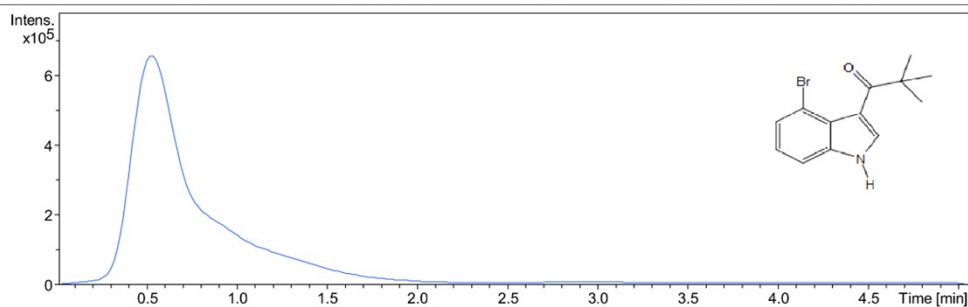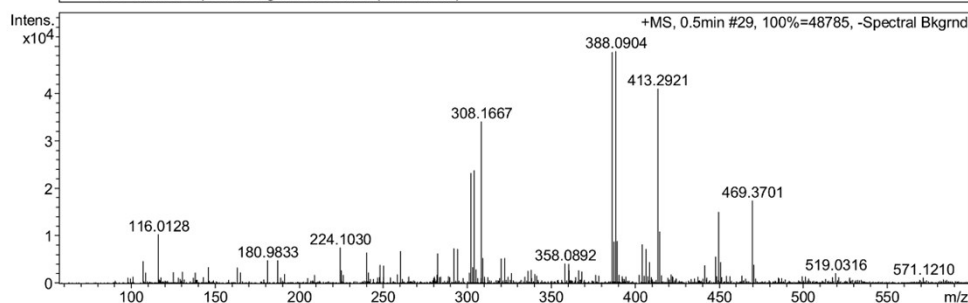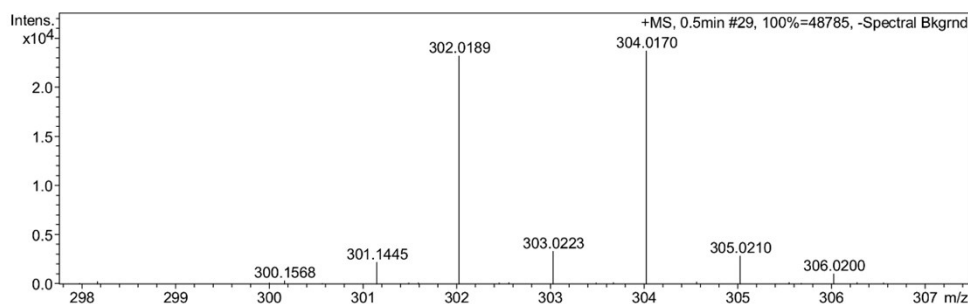

Supplement: c7ra11362e1.pdf [file c7ra11362e1.pdf]
